# Supplementary material for: Comparison of Different d-SPE Sorbent Performances Based on Quick, Easy, Cheap, Effective, Rugged, and Safe (QuEChERS) Methodology for Multiresidue Pesticide Analyses in Rapeseeds
Source: MDPI journal article supplement (doi:10.3390/molecules26216727), 2021-11-06
Supplement: s1 [file s1]

## Tables

Table S1: Names, CAS number, Log P and HPLC-MS/MS acquisition parameters of studied pesticides and contaminants

| Pesticides            | R <sub>t</sub> (min) | CAS number  | Log P | Quantification transition |                     |        |        |         | Confirmation transition |                     |        |        |         |
|-----------------------|----------------------|-------------|-------|---------------------------|---------------------|--------|--------|---------|-------------------------|---------------------|--------|--------|---------|
|                       |                      |             |       | Precursor ions (m/z)      | Fragment ions (m/z) | DP (V) | CE (V) | CXP (V) | Precursor ions (m/z)    | Fragment ions (m/z) | DP (V) | CE (V) | CXP (V) |
| Acephate              | 3.91                 | 30650-19-1  | -0.85 | 184                       | 143                 | 66     | 13     | 12      | 184                     | 125                 | 66     | 25     | 22      |
| Acetochlor            | 5.53                 | 34256-82-1  | 3.03  | 270                       | 224                 | 56     | 11     | 12      | 270                     | 148                 | 56     | 29     | 8       |
| Acibenzolar-S- methyl | 6.41                 | 135158-54-2 | 3.01  | 211                       | 136                 | 46     | 39     | 6       | 211                     | 140                 | 46     | 31     | 6       |
| Alachlor              | 6.72                 | 15972-60-8  | 3.52  | 270                       | 162                 | 71     | 25     | 8       | 270                     | 45                  | 71     | 27     | 10      |
| Aldicarb sulfone      | 3.02                 | 1646-88-4   | -0.57 | 223                       | 86                  | 76     | 29     | 14      | 223                     | 148                 | 76     | 13     | 14      |
| Ametoctradin          | 7.85                 | 865318-97-4 | 4. 40 | 276                       | 70                  | 26     | 81     | 10      | 276                     | 43                  | 26     | 103    | 8       |
| Ametryn               | 5.43                 | 834-12-8    | 2.98  | 228                       | 186                 | 60     | 37     | 14      | 228                     | 96                  | 60     | 35     | 16      |
| Anilofos              | 6.92                 | 64249-01-0  | 3.81  | 368                       | 199                 | 66     | 19     | 18      | 368                     | 125                 | 66     | 45     | 18      |
| Azaconazole           | 4.37                 | 60207-31-0  | 2.32  | 302                       | 161                 | 56     | 39     | 10      | 302                     | 231                 | 56     | 23     | 12      |
| Azinphos-methyl       | 5.02                 | 86-50-0     | 2.75  | 318                       | 261                 | 71     | 11     | 20      | 318                     | 132                 | 71     | 21     | 8       |
| Aziprotryne           | 5.92                 | 4658-28-0   | 3.00  | 226                       | 156                 | 76     | 21     | 12      | 226                     | 125                 | 76     | 17     | 14      |
| Azoxystrobin          | 5.55                 | 131860-33-8 | 2.50  | 404                       | 372                 | 66     | 21     | 10      | 404                     | 344                 | 66     | 29     | 18      |
| Barban                | 7.24                 | 101-27-9    | 3.41  | 258                       | 143                 | 86     | 29     | 10      | 258                     | 178                 | 86     | 13     | 12      |
| Benalaxyl             | 6.79                 | 71626-11-4  | 3.40  | 326                       | 148                 | 76     | 27     | 8       | 326                     | 208                 | 76     | 21     | 10      |
| Benoxacor             | 7.34                 | 98730-04-2  | 2.70  | 262                       | 149                 | 156    | 25     | 16      | 262                     | 134                 | 156    | 39     | 14      |
| Bifenox               | 9.21                 | 42576-02-3  | 4.48  | 359                       | 310                 | 64     | 17     | 18      | 359                     | 189                 | 64     | 35     | 20      |
| Bixafen               | 6.46                 | 581809-46-3 | 4.70  | 415                       | 395                 | 126    | 21     | 24      | 415                     | 267                 | 126    | 33     | 18      |
| Boscalid              | 7.15                 | 188425-85-6 | 2.96  | 343                       | 307                 | 106    | 29     | 18      | 343                     | 140                 | 106    | 29     | 12      |
| Bupirimate            | 7.64                 | 41483-43-6  | 2.70  | 317                       | 166                 | 71     | 33     | 16      | 317                     | 237                 | 71     | 27     | 18      |
| Buprofezin            | 9.04                 | 69327-76-0  | 4.30  | 306                       | 201                 | 56     | 17     | 14      | 306                     | 116                 | 56     | 23     | 20      |
| Chlorfenvinphos       | 8.40                 | 470-90-6    | 3.81  | 359                       | 155                 | 69     | 19     | 8       | 359                     | 99                  | 69     | 43     | 16      |
| Chlorobromuron        | 8.51                 | 13360-45-7  | 3.09  | 295                       | 206                 | 136    | 27     | 20      | 293                     | 203                 | 136    | 31     | 12      |
| Chlorfluazuron        | 10.32                | 71422-67-8  | 5.80  | 542                       | 385                 | 176    | 33     | 18      | 542                     | 158                 | 176    | 27     | 8       |
| Chlorpyrifos          | 9.11                 | 2921-88-2   | 4.96  | 350                       | 97                  | 86     | 41     | 6       | 350                     | 198                 | 86     | 25     | 10      |

|                             |       |             |       |     |     |     |    |    |     |     |     |     |    |
|-----------------------------|-------|-------------|-------|-----|-----|-----|----|----|-----|-----|-----|-----|----|
| Chlorpyrifos-methyl         | 9.23  | 5598-13-0   | 4.31  | 322 | 125 | 71  | 27 | 6  | 322 | 290 | 71  | 25  | 16 |
| Cinosulfuron                | 4.76  | 94593-91-6  | 2.04  | 414 | 183 | 81  | 23 | 10 | 414 | 215 | 81  | 21  | 10 |
| Climbazole                  | 5.94  | 38083-17-9  | 3.70  | 293 | 197 | 111 | 23 | 24 | 293 | 69  | 111 | 59  | 16 |
| Clodinafop-propargyl        | 6.02  | 105512-06-9 | 3.90  | 350 | 266 | 104 | 21 | 14 | 350 | 91  | 104 | 41  | 18 |
| Clofentezine                | 5.87  | 74115-24-5  | 3.10  | 303 | 138 | 60  | 27 | 10 | 303 | 102 | 60  | 59  | 18 |
| Cloquintocet-mexyl          | 7.32  | 99607-70-2  | 5.03  | 336 | 238 | 91  | 27 | 12 | 336 | 192 | 91  | 41  | 12 |
| Coumaphos                   | 6.51  | 56-72-4     | 4.13  | 363 | 227 | 101 | 35 | 12 | 363 | 307 | 101 | 23  | 16 |
| Coumatetralyl               | 5.46  | 5836-29-3   | 3.46  | 293 | 175 | 66  | 45 | 16 | 293 | 141 | 66  | 41  | 12 |
| Crufomate                   | 8.76  | 299-86-5    | 3.42  | 292 | 236 | 96  | 27 | 14 | 292 | 108 | 96  | 39  | 6  |
| Cyanazine                   | 7.11  | 21725-46-2  | 2.22  | 241 | 214 | 81  | 25 | 12 | 241 | 243 | 81  | 25  | 14 |
| Cycloxydim                  | 6.21  | 101205-02-1 | 3.20  | 326 | 280 | 101 | 19 | 16 | 326 | 180 | 101 | 29  | 12 |
| Cyflumetofen                | 5.98  | 400882-07-7 | 4.30  | 465 | 173 | 121 | 33 | 10 | 465 | 249 | 121 | 53  | 32 |
| Cymiazole                   | 2.96  | 61676-87-7  | 0.60  | 219 | 171 | 86  | 37 | 14 | 219 | 144 | 86  | 43  | 8  |
| Cyproconazole               | 4.67  | 94361-06-5  | 2.90  | 292 | 70  | 81  | 35 | 10 | 292 | 125 | 81  | 35  | 6  |
| Cyprodinil                  | 9.58  | 121552-61-2 | 4.00  | 226 | 93  | 84  | 47 | 16 | 226 | 91  | 84  | 49  | 16 |
| Demeton-S-methyl<br>sulfone | 3.48  | 17040-19-6  | -0.30 | 263 | 169 | 61  | 23 | 14 | 263 | 121 | 61  | 23  | 10 |
| Desmetryn                   | 5.86  | 1014-69-3   | 2.38  | 214 | 172 | 126 | 23 | 10 | 214 | 124 | 126 | 59  | 20 |
| Diafenthiuron               | 10.05 | 80060-09-9  | 6.00  | 385 | 329 | 26  | 25 | 20 | 385 | 270 | 26  | 19  | 18 |
| Dialifos                    | 7.76  | 10311-84-9  | 4.69  | 394 | 208 | 39  | 23 | 10 | 394 | 187 | 39  | 13  | 12 |
| Diazinon                    | 7.43  | 333-41-5    | 3.81  | 305 | 169 | 71  | 29 | 8  | 305 | 97  | 71  | 41  | 6  |
| Diclofop-methyl             | 6.92  | 51338-27-3  | 4.62  | 358 | 281 | 64  | 21 | 16 | 358 | 120 | 64  | 39  | 8  |
| Diethofencarb               | 5.67  | 87130-20-9  | 2.91  | 268 | 226 | 81  | 15 | 12 | 268 | 180 | 81  | 23  | 10 |
| Difenoconazole              | 8.54  | 119446-68-3 | 4.30  | 406 | 251 | 66  | 37 | 14 | 406 | 337 | 66  | 23  | 18 |
| Diflufenican                | 7.78  | 83164-33-4  | 4.90  | 395 | 266 | 66  | 33 | 16 | 395 | 246 | 66  | 49  | 16 |
| Dimethachlor                | 9.08  | 50563-36-5  | 2.17  | 256 | 224 | 86  | 21 | 14 | 256 | 148 | 86  | 33  | 8  |
| Dimethenamid                | 7.63  | 87674-68-8  | 2.15  | 276 | 244 | 44  | 29 | 10 | 276 | 168 | 44  | 33  | 10 |
| Dimethomorph                | 6.70  | 110488-70-5 | 2.68  | 388 | 301 | 91  | 29 | 18 | 388 | 165 | 91  | 43  | 8  |
| Dimoxystrobin               | 5.56  | 149961-52-4 | 3.90  | 327 | 205 | 56  | 15 | 12 | 327 | 116 | 56  | 57  | 14 |
| Dioxathion                  | 4.89  | 78-34-2     | 3.00  | 474 | 271 | 96  | 19 | 14 | 474 | 97  | 96  | 61  | 6  |
| Dipropetryn                 | 6.87  | 4147-51-7   | 3.81  | 256 | 214 | 51  | 31 | 12 | 256 | 144 | 51  | 37  | 10 |
| Ditalimphos                 | 7.67  | 5131-24-8   | 3.48  | 300 | 148 | 76  | 29 | 26 | 300 | 130 | 76  | 47  | 10 |
| Eamectin Ba                 | 10.78 | 155569-91-8 | 5.00  | 886 | 158 | 36  | 43 | 10 | 886 | 82  | 36  | 127 | 12 |

|                       |       |             |      |     |     |     |    |    |     |     |     |     |    |
|-----------------------|-------|-------------|------|-----|-----|-----|----|----|-----|-----|-----|-----|----|
| Emamectin Bb          | 10.03 | 155569-91-8 | 3.70 | 886 | 158 | 36  | 43 | 10 | 886 | 82  | 36  | 127 | 12 |
| Epoxiconazole         | 8.91  | 133855-98-8 | 3.44 | 330 | 121 | 81  | 27 | 6  | 330 | 101 | 81  | 63  | 6  |
| Etaconazole           | 9.12  | 60207-93-4  | 3.10 | 329 | 159 | 86  | 37 | 12 | 329 | 55  | 86  | 47  | 8  |
| Ethion                | 10.73 | 563-12-2    | 5.07 | 385 | 199 | 36  | 17 | 12 | 385 | 171 | 36  | 23  | 8  |
| Ethofumesate          | 4.00  | 26225-79-6  | 2.70 | 287 | 121 | 81  | 23 | 8  | 287 | 161 | 81  | 27  | 10 |
| Ethoprophos           | 7.34  | 13194-48-4  | 3.59 | 243 | 131 | 56  | 29 | 6  | 243 | 97  | 56  | 41  | 10 |
| Etoxazole             | 6.75  | 153233-91-1 | 5.59 | 360 | 141 | 71  | 41 | 14 | 360 | 113 | 71  | 79  | 8  |
| Etrimfos              | 4.51  | 38260-54-7  | 3.20 | 293 | 125 | 81  | 33 | 6  | 293 | 265 | 81  | 21  | 14 |
| Famoxadone            | 3.79  | 131807-57-3 | 4.65 | 392 | 331 | 61  | 15 | 18 | 392 | 238 | 61  | 23  | 12 |
| Fenamiphos            | 6.00  | 22224-92-6  | 3.23 | 304 | 217 | 81  | 31 | 12 | 304 | 202 | 81  | 45  | 10 |
| Fenarimol             | 7.65  | 60168-88-9  | 3.65 | 331 | 268 | 86  | 33 | 18 | 331 | 81  | 86  | 47  | 4  |
| Fenazaquin            | 9.76  | 120928-09-8 | 5.51 | 307 | 161 | 56  | 31 | 8  | 307 | 147 | 56  | 25  | 8  |
| Fenbuconazole         | 8.09  | 114369-43-6 | 3.23 | 337 | 125 | 76  | 37 | 6  | 337 | 70  | 76  | 33  | 6  |
| Fenpropidin           | 7.95  | 67306-00-7  | 5.50 | 274 | 147 | 76  | 37 | 8  | 374 | 117 | 76  | 65  | 6  |
| Fenpropimorph         | 9.12  | 67564-91-4  | 4.93 | 304 | 147 | 91  | 39 | 8  | 304 | 117 | 91  | 71  | 8  |
| Fenpyroximate         | 5.69  | 134098-61-6 | 5.01 | 422 | 366 | 126 | 23 | 10 | 422 | 135 | 126 | 41  | 8  |
| Fensulfothion         | 4.09  | 115-90-2    | 2.23 | 309 | 281 | 66  | 17 | 16 | 309 | 253 | 66  | 25  | 16 |
| Fensulfothion-oxon    | 5.32  | 6552-21-2   | 1.40 | 264 | 231 | 101 | 23 | 14 | 264 | 216 | 101 | 33  | 14 |
| Fensulfothion-sulfone | 4.63  | 14255-72-2  | 2.56 | 325 | 269 | 51  | 21 | 16 | 325 | 297 | 51  | 17  | 18 |
| Fenthion              | 2.78  | 55-38-9     | 4.09 | 279 | 247 | 66  | 19 | 16 | 279 | 169 | 66  | 17  | 14 |
| Fenthion sulfone      | 4.42  | 3761-42-0   | 2.80 | 311 | 125 | 101 | 29 | 8  | 311 | 279 | 101 | 27  | 16 |
| Fenthion sulfoxide    | 3.25  | 3761-41-9   | 2.70 | 295 | 280 | 96  | 25 | 16 | 295 | 127 | 96  | 41  | 22 |
| Flamprop-isopropyl    | 7.39  | 52756-22-6  | 3.69 | 364 | 105 | 64  | 15 | 12 | 364 | 304 | 64  | 17  | 8  |
| Flazasulfuron         | 3.15  | 104040-78-0 | 1.08 | 408 | 182 | 96  | 23 | 12 | 408 | 227 | 96  | 25  | 10 |
| Florasulam            | 3.12  | 145701-23-1 | 1.22 | 360 | 129 | 80  | 29 | 8  | 360 | 192 | 80  | 23  | 10 |
| Flubendiamide         | 6.74  | 272451-65-7 | 4.20 | 683 | 408 | 176 | 13 | 20 | 683 | 256 | 176 | 85  | 14 |
| Flucycloxuron         | 7.46  | 94050-52-9  | 6.10 | 484 | 132 | 71  | 45 | 22 | 484 | 169 | 71  | 57  | 22 |
| Flufenacet            | 5.85  | 142459-58-3 | 3.20 | 364 | 194 | 44  | 17 | 12 | 364 | 152 | 44  | 27  | 8  |
| Flufenoxuron          | 9.54  | 101463-69-8 | 6.16 | 489 | 158 | 71  | 27 | 8  | 489 | 141 | 71  | 57  | 6  |
| Fluopicolide          | 5.45  | 239110-15-7 | 3.26 | 385 | 175 | 71  | 33 | 14 | 385 | 173 | 71  | 33  | 14 |
| Flurochloridon        | 4.87  | 61213-25-0  | 3.36 | 312 | 292 | 76  | 29 | 18 | 312 | 145 | 76  | 67  | 8  |
| Flurprimidol          | 4.42  | 56425-91-3  | 3.34 | 313 | 270 | 36  | 33 | 16 | 313 | 201 | 36  | 23  | 12 |
| Flurtamone            | 4.59  | 96525-23-4  | 4.50 | 334 | 247 | 81  | 39 | 14 | 334 | 178 | 81  | 67  | 10 |

|                    |      |             |       |     |     |     |    |    |     |     |     |    |    |
|--------------------|------|-------------|-------|-----|-----|-----|----|----|-----|-----|-----|----|----|
| Flusilazole        | 6.29 | 85509-19-9  | 3.70  | 316 | 247 | 106 | 27 | 14 | 316 | 169 | 106 | 25 | 14 |
| Fluxapyroxad       | 7.21 | 907204-31-3 | 3.70  | 382 | 362 | 166 | 19 | 16 | 382 | 342 | 166 | 29 | 32 |
| Fluxastrobin       | 5.62 | 887973-21-9 | 2.86  | 460 | 428 | 81  | 25 | 12 | 460 | 189 | 81  | 19 | 26 |
| Fonofos            | 6.08 | 944-22-9    | 3.94  | 247 | 137 | 96  | 15 | 8  | 247 | 109 | 96  | 25 | 6  |
| Foramsulfuron      | 2.00 | 173159-57-4 | -0.78 | 453 | 182 | 61  | 27 | 12 | 453 | 272 | 61  | 21 | 16 |
| Forchlofenuron     | 4.56 | 68157-60-8  | 3.20  | 248 | 129 | 111 | 23 | 12 | 248 | 155 | 111 | 23 | 10 |
| Furmecyclox        | 8.46 | 60568-05-0  | 3.10  | 252 | 170 | 56  | 17 | 12 | 252 | 129 | 56  | 31 | 16 |
| Haloxfop-methyl    | 8.73 | 69806-40-2  | 4.07  | 376 | 316 | 129 | 23 | 18 | 376 | 288 | 129 | 33 | 14 |
| Heptenophos        | 5.41 | 23560-59-0  | 2.32  | 251 | 127 | 96  | 23 | 22 | 251 | 109 | 96  | 37 | 6  |
| Hexazinone         | 4.32 | 51235-04-2  | 1.85  | 253 | 171 | 71  | 21 | 8  | 253 | 71  | 71  | 47 | 4  |
| Hexythiazox        | 8.56 | 78587-05-0  | 5.57  | 353 | 228 | 71  | 23 | 14 | 353 | 168 | 71  | 33 | 12 |
| Imazalil           | 6.39 | 35554-44-0  | 3.82  | 297 | 159 | 66  | 31 | 14 | 297 | 201 | 66  | 23 | 10 |
| Imazosulfuron      | 3.77 | 122548-33-8 | 2.43  | 413 | 153 | 61  | 19 | 10 | 413 | 156 | 61  | 29 | 10 |
| Imibenconazole     | 5.22 | 86598-92-7  | 4.94  | 411 | 125 | 86  | 43 | 8  | 411 | 171 | 86  | 27 | 10 |
| Indoxacarb         | 6.00 | 144171-61-9 | 4.65  | 528 | 293 | 64  | 21 | 18 | 528 | 203 | 64  | 51 | 12 |
| Ipconazole         | 7.43 | 125225-28-7 | 4.21  | 334 | 70  | 151 | 67 | 10 | 334 | 125 | 151 | 61 | 16 |
| Isofenphos         | 8.81 | 25311-71-1  | 4.12  | 346 | 245 | 86  | 17 | 14 | 346 | 217 | 86  | 33 | 16 |
| Isofenphos-methyl  | 8.02 | 99675-03-3  | 3.80  | 332 | 231 | 61  | 19 | 20 | 332 | 273 | 61  | 7  | 14 |
| Isopyrazam         | 5.69 | 881685-58-1 | 4.00  | 360 | 244 | 111 | 35 | 18 | 360 | 320 | 111 | 31 | 16 |
| Isoxaflutole       | 4.09 | 141112-29-0 | 2.32  | 360 | 251 | 31  | 21 | 8  | 360 | 220 | 31  | 27 | 18 |
| Kresoxim-methyl    | 5.32 | 143390-89-0 | 3.40  | 331 | 116 | 66  | 25 | 20 | 314 | 206 | 66  | 13 | 10 |
| Linuron            | 4.63 | 330-55-2    | 3.20  | 249 | 160 | 66  | 25 | 10 | 249 | 182 | 66  | 23 | 12 |
| Malaoxon           | 2.78 | 1634-78-2   | 0.60  | 315 | 127 | 66  | 19 | 8  | 315 | 269 | 66  | 13 | 16 |
| Malathion          | 4.42 | 121-75-5    | 2.36  | 331 | 127 | 86  | 17 | 8  | 331 | 285 | 86  | 11 | 16 |
| Mecarbam           | 4.20 | 2595-54-2   | 2.29  | 330 | 227 | 76  | 15 | 12 | 330 | 97  | 76  | 45 | 6  |
| Mepanipyrim        | 6.49 | 110235-47-7 | 3.28  | 224 | 106 | 119 | 35 | 6  | 224 | 77  | 119 | 49 | 8  |
| Metaflumizone      | 9.16 | 139968-49-3 | 6.20  | 507 | 178 | 176 | 33 | 10 | 507 | 287 | 176 | 35 | 6  |
| Metalaxyl          | 3.74 | 57837-19-1  | 1.65  | 280 | 220 | 81  | 19 | 12 | 280 | 160 | 81  | 31 | 10 |
| Metazachlor        | 4.04 | 67129-08-2  | 2.13  | 278 | 134 | 66  | 29 | 8  | 278 | 210 | 66  | 15 | 10 |
| Methabenzthiazuron | 6.41 | 18691-97-9  | 2.64  | 222 | 165 | 76  | 23 | 10 | 222 | 150 | 76  | 45 | 12 |
| Methidathion       | 5.85 | 950-37-8    | 2.20  | 303 | 145 | 79  | 13 | 26 | 303 | 85  | 79  | 29 | 14 |
| Methiocarb         | 4.96 | 2032-65-7   | 2.92  | 226 | 169 | 74  | 15 | 10 | 226 | 169 | 74  | 25 | 8  |
| Methoprotryne      | 3.49 | 841-06-5    | 2.82  | 272 | 198 | 61  | 31 | 8  | 272 | 240 | 61  | 27 | 14 |

|                    |      |             |      |     |     |     |    |    |     |     |     |    |    |
|--------------------|------|-------------|------|-----|-----|-----|----|----|-----|-----|-----|----|----|
| Methoxyfenozide    | 4.81 | 161050-58-4 | 3.70 | 369 | 149 | 86  | 23 | 8  | 369 | 133 | 86  | 31 | 8  |
| Metobromuron       | 3.67 | 3060-89-7   | 2.38 | 259 | 148 | 81  | 23 | 10 | 259 | 172 | 81  | 27 | 10 |
| Metolachlor        | 4.50 | 51218-45-2  | 3.13 | 284 | 252 | 76  | 21 | 16 | 284 | 176 | 76  | 35 | 10 |
| Metrafenone        | 7.43 | 220899-03-6 | 4.60 | 409 | 209 | 39  | 21 | 10 | 409 | 227 | 39  | 25 | 14 |
| Napropamid         | 7.21 | 15299-99-7  | 3.36 | 272 | 129 | 96  | 21 | 16 | 272 | 199 | 96  | 19 | 12 |
| Norflurazon        | 6.60 | 27314-13-2  | 2.30 | 304 | 284 | 99  | 31 | 16 | 304 | 160 | 99  | 41 | 8  |
| Oxadiargyl         | 8.03 | 39807-15-3  | 3.95 | 341 | 230 | 56  | 21 | 14 | 341 | 151 | 56  | 24 | 15 |
| Oxycarboxim        | 2.16 | 5259-88-1   | 0.77 | 268 | 175 | 96  | 21 | 16 | 268 | 147 | 96  | 29 | 16 |
| Paclobutrazol      | 5.80 | 76738-62-0  | 3.20 | 294 | 70  | 84  | 39 | 10 | 294 | 125 | 84  | 49 | 6  |
| Pencycuron         | 7.53 | 66063-05-6  | 4.82 | 329 | 125 | 196 | 35 | 14 | 329 | 99  | 196 | 83 | 6  |
| Penthiopyrad       | 6.99 | 183675-82-3 | 4.00 | 360 | 276 | 141 | 21 | 26 | 360 | 177 | 141 | 41 | 12 |
| Pethoxamid         | 6.14 | 106700-29-2 | 3.50 | 296 | 131 | 46  | 29 | 8  | 296 | 250 | 46  | 19 | 16 |
| Phenthoate         | 5.87 | 2597-03-7   | 3.69 | 321 | 163 | 81  | 17 | 8  | 321 | 163 | 81  | 17 | 10 |
| Phosalone          | 8.76 | 2310-17-0   | 4.38 | 368 | 182 | 69  | 19 | 14 | 368 | 11  | 69  | 51 | 8  |
| Phosmet            | 5.36 | 732-11-6    | 2.78 | 318 | 133 | 79  | 51 | 8  | 318 | 160 | 79  | 19 | 14 |
| Phosphamidon       | 3.21 | 13171-21-6  | 0.79 | 300 | 127 | 76  | 29 | 12 | 300 | 174 | 76  | 19 | 8  |
| Phoxim             | 8.12 | 14816-18-3  | 4.39 | 299 | 129 | 46  | 17 | 6  | 299 | 77  | 46  | 41 | 12 |
| Picolinafen        | 8.54 | 137641-05-5 | 4.90 | 377 | 238 | 76  | 43 | 14 | 377 | 145 | 76  | 69 | 10 |
| Picoxystrobin      | 7.60 | 117428-22-5 | 3.60 | 368 | 205 | 81  | 15 | 10 | 368 | 145 | 81  | 27 | 10 |
| Pinoxaden          | 7.11 | 243973-20-8 | 3.20 | 401 | 317 | 121 | 29 | 14 | 401 | 57  | 121 | 29 | 18 |
| Piperonyl Butoxyde | 9.61 | 51-03-6     | 4.75 | 356 | 177 | 64  | 17 | 14 | 356 | 119 | 64  | 49 | 8  |
| Pirimiphos-ethyl   | 8.58 | 23505-41-1  | 4.85 | 334 | 198 | 81  | 29 | 10 | 334 | 182 | 81  | 27 | 12 |
| Pirimiphos-methyl  | 7.29 | 29232-93-7  | 4.20 | 306 | 164 | 71  | 29 | 8  | 306 | 108 | 71  | 39 | 6  |
| Prochloraz         | 7.77 | 67747-09-5  | 4.10 | 376 | 308 | 66  | 17 | 16 | 376 | 266 | 66  | 23 | 14 |
| Profenofos         | 8.03 | 41198-08-7  | 4.68 | 373 | 303 | 76  | 25 | 18 | 373 | 97  | 76  | 43 | 16 |
| Prometon           | 5.48 | 1610-18-0   | 2.99 | 226 | 142 | 41  | 29 | 10 | 226 | 184 | 41  | 23 | 10 |
| Prometryn          | 5.67 | 7287-19-6   | 3.51 | 242 | 158 | 86  | 33 | 10 | 242 | 200 | 86  | 25 | 12 |
| Propaphos          | 6.36 | 7292-16-2   | 3.67 | 305 | 221 | 90  | 21 | 14 | 305 | 141 | 90  | 35 | 8  |
| Propaquinazid      | 9.89 | 189278-12-4 | 5.50 | 373 | 331 | 41  | 21 | 30 | 373 | 289 | 41  | 33 | 16 |
| Propargite         | 9.71 | 2312-35-8   | 5.00 | 368 | 231 | 49  | 17 | 24 | 368 | 175 | 49  | 23 | 16 |
| Propazine          | 4.87 | 139-40-2    | 2.93 | 230 | 146 | 96  | 33 | 12 | 230 | 188 | 96  | 23 | 12 |
| Propiconazole      | 5.98 | 60207-90-1  | 3.72 | 342 | 159 | 61  | 37 | 8  | 342 | 69  | 61  | 33 | 4  |
| Propyzamide        | 6.12 | 23950-58-5  | 3.43 | 256 | 173 | 76  | 31 | 8  | 256 | 190 | 76  | 19 | 12 |

|                |       |             |       |     |     |     |    |    |     |     |     |     |    |
|----------------|-------|-------------|-------|-----|-----|-----|----|----|-----|-----|-----|-----|----|
| Prosulfocarb   | 6.69  | 52888-80-9  | 4.65  | 252 | 91  | 71  | 31 | 16 | 252 | 128 | 71  | 19  | 8  |
| Pyraclostrobin | 7.99  | 175013-18-0 | 3.99  | 388 | 194 | 66  | 19 | 16 | 388 | 163 | 66  | 29  | 6  |
| Pyrazophos     | 7.51  | 13457-18-6  | 3.80  | 374 | 222 | 86  | 29 | 12 | 374 | 194 | 86  | 43  | 10 |
| Pyridaben      | 9.64  | 96489-71-3  | 6.37  | 365 | 309 | 96  | 19 | 18 | 365 | 147 | 96  | 31  | 8  |
| Pyridafenthion | 8.72  | 119-12-0    | 3.20  | 341 | 189 | 61  | 29 | 10 | 341 | 205 | 61  | 27  | 10 |
| Pyridate       | 10.09 | 55512-33-9  | 6.60  | 379 | 207 | 56  | 25 | 14 | 379 | 351 | 56  | 15  | 16 |
| Rimsulfuron    | 2.45  | 122931-48-0 | -1.46 | 432 | 182 | 161 | 29 | 16 | 432 | 325 | 161 | 21  | 14 |
| Saflufenacil   | 5.14  | 372137-35-4 | 2.60  | 501 | 198 | 156 | 61 | 20 | 501 | 349 | 156 | 41  | 10 |
| Spinosyn-A     | 5.01  | 131929-60-7 | 2.80  | 733 | 142 | 84  | 39 | 8  | 98  | 84  | 84  | 107 | 28 |
| Spirotetramat  | 4.97  | 203313-25-1 | 2.51  | 374 | 216 | 116 | 45 | 14 | 374 | 302 | 116 | 23  | 14 |
| Spiroxamine    | 5.05  | 118134-30-8 | 2.89  | 298 | 144 | 51  | 29 | 10 | 298 | 100 | 51  | 49  | 6  |
| Sulfotep       | 7.06  | 3689-24-5   | 3.99  | 323 | 97  | 96  | 45 | 4  | 323 | 115 | 96  | 39  | 8  |
| Tebufenozide   | 7.98  | 112410-23-8 | 4.25  | 353 | 133 | 71  | 23 | 6  | 353 | 297 | 71  | 15  | 16 |
| Tebufenpyrad   | 8.23  | 119168-77-3 | 4.93  | 334 | 145 | 86  | 37 | 8  | 334 | 117 | 86  | 47  | 12 |
| Tepraloxymid   | 6.65  | 149979-41-9 | 1.50  | 342 | 250 | 116 | 19 | 26 | 242 | 166 | 116 | 29  | 18 |
| Terbufos       | 9.75  | 13071-79-9  | 4.48  | 289 | 103 | 69  | 13 | 6  | 289 | 233 | 69  | 9   | 14 |
| Thiobencarb    | 9.35  | 28249-77-6  | 4.23  | 258 | 125 | 53  | 29 | 12 | 258 | 89  | 53  | 69  | 14 |
| Tolfenpyrad    | 9.84  | 129558-76-5 | 5.61  | 384 | 197 | 121 | 41 | 16 | 384 | 154 | 121 | 59  | 10 |
| Tralkoxydim    | 5.81  | 87820-88-0  | 2.10  | 330 | 284 | 126 | 17 | 18 | 330 | 138 | 126 | 27  | 10 |
| Triadimefon    | 6.52  | 43121-43-3  | 2.77  | 294 | 197 | 71  | 23 | 14 | 294 | 69  | 71  | 59  | 8  |
| Triallate      | 9.71  | 2303-17-5   | 4.60  | 304 | 86  | 81  | 25 | 14 | 304 | 143 | 81  | 37  | 12 |
| Tridemorph     | 10.01 | 24602-86-6  | 6.90  | 298 | 130 | 51  | 35 | 6  | 298 | 116 | 51  | 33  | 8  |
| Triforine      | 6.08  | 26644-46-2  | 2.20  | 435 | 390 | 81  | 15 | 10 | 435 | 98  | 81  | 31  | 10 |
| Zoxamide       | 8.87  | 156052-68-5 | 3.76  | 336 | 159 | 100 | 47 | 16 | 336 | 187 | 100 | 29  | 14 |

Table S2: Pesticide recoveries and the relative standard deviations using different purification sorbents, freezing process and without clean-up for QuEChERS purification step of rapeseed extracts.

| Analytes             | Without cleanup |           |           |           | Freezing  |           |           |           | C18/PSA   |           |           |           | EMR-Lipid |           |           |           | Z-Sep     |           |           |           | Z-Sep+    |           |           |           |
|----------------------|-----------------|-----------|-----------|-----------|-----------|-----------|-----------|-----------|-----------|-----------|-----------|-----------|-----------|-----------|-----------|-----------|-----------|-----------|-----------|-----------|-----------|-----------|-----------|-----------|
|                      | 10 µg/kg        |           | 50 µg/kg  |           | 10 µg/kg  |           | 50 µg/kg  |           | 10 µg/kg  |           | 50 µg/kg  |           | 10 µg/kg  |           | 50 µg/kg  |           | 10 µg/kg  |           | 50 µg/kg  |           | 10 µg/kg  |           | 50 µg/kg  |           |
|                      | Rec,<br>%       | RSD,<br>% | Rec,<br>% | RSD,<br>% | Rec,<br>% | RSD,<br>% | Rec,<br>% | RSD,<br>% | Rec,<br>% | RSD,<br>% | Rec,<br>% | RSD,<br>% | Rec,<br>% | RSD,<br>% | Rec,<br>% | RSD,<br>% | Rec,<br>% | RSD,<br>% | Rec,<br>% | RSD,<br>% | Rec,<br>% | RSD,<br>% | Rec,<br>% | RSD,<br>% |
| Acephate             | 63              | 11        | 64        | 7         | 66        | 8         | 58        | 3         | 72        | 4         | 68        | 22        | 80        | 12        | 82        | 4         | 59        | 8         | 60        | 9         | 81        | 12        | 67        | 4         |
| Acetochlor           | 44              | 17        | 54        | 16        | 61        | 8         | 60        | 2         | 61        | 13        | 60        | 5         | 80        | 9         | 71        | 2         | 53        | 5         | 50        | 5         | 64        | 14        | 63        | 6         |
| Acibenzolar-S-methyl | 88              | 8         | 118       | 20        | 53        | 13        | 50        | 5         | 54        | 12        | 34        | 4         | 50        | 9         | 58        | 11        | 34        | 12        | 41        | 17        | 0         | /         | 58        | 14        |
| Alachlor             | 62              | 11        | 66        | 9         | 66        | 8         | 63        | 2         | 61        | 5         | 56        | 3         | 82        | 5         | 80        | 6         | 54        | 3         | 52        | 7         | 56        | 18        | 48        | 3         |
| Aldicarb sulfone     | 92              | 3         | 89        | 4         | 45        | 6         | 31        | 11        | 90        | 11        | 82        | 6         | 103       | 4         | 101       | 7         | 0         | /         | 0         | /         | 104       | 11        | 91        | 5         |
| Ametoctradin         | 82              | 19        | 94        | 10        | 77        | 14        | 65        | 7         | 56        | 10        | 59        | 6         | 77        | 4         | 79        | 7         | 65        | 11        | 59        | 7         | 57        | 18        | 46        | 11        |
| Ametryn              | 48              | 7         | 52        | 8         | 41        | 5         | 40        | 2         | 29        | 4         | 28        | 5         | 64        | 5         | 63        | 8         | 34        | 2         | 33        | 6         | 49        | 22        | 47        | 9         |
| Anilofos             | 64              | 14        | 44        | 3         | 51        | 7         | 42        | 3         | 37        | 6         | 28        | 3         | 67        | 14        | 57        | 3         | 41        | 4         | 33        | 8         | 72        | 19        | 51        | 4         |
| Azaconazole          | 89              | 6         | 99        | 8         | 56        | 11        | 53        | 3         | 35        | 5         | 39        | 6         | 66        | 6         | 70        | 8         | 46        | 5         | 46        | 4         | 60        | 17        | 58        | 8         |
| Azinphos-methyl      | 98              | 3         | 56        | 6         | 51        | 20        | 45        | 4         | 0         | /         | 26        | 19        | 72        | 12        | 61        | 9         | 40        | 10        | 36        | 5         | 58        | 7         | 64        | 6         |
| Aziprotryne          | 73              | 12        | 77        | 10        | 79        | 13        | 68        | 6         | 62        | 5         | 67        | 1         | 80        | 8         | 78        | 6         | 62        | 6         | 55        | 7         | 66        | 22        | 62        | 9         |
| Azoxystrobin         | 74              | 9         | 72        | 5         | 63        | 10        | 56        | 3         | 47        | 8         | 44        | 5         | 75        | 6         | 76        | 5         | 51        | 2         | 46        | 6         | 59        | 19        | 55        | 9         |
| Barban               | 109             | 18        | 90        | 21        | 73        | 19        | 67        | 10        | 74        | 12        | 59        | 11        | 52        | 36        | 70        | 17        | 74        | 3         | 60        | 10        | 0         | /         | 60        | 31        |
| Benalaxyl            | 64              | 13        | 60        | 14        | 72        | 17        | 65        | 2         | 57        | 4         | 55        | 3         | 90        | 5         | 91        | 9         | 63        | 5         | 60        | 11        | 69        | 19        | 71        | 14        |
| Benoxacor            | 62              | 8         | 55        | 8         | 65        | 6         | 56        | 6         | 41        | 10        | 42        | 10        | 74        | 6         | 71        | 3         | 49        | 7         | 47        | 9         | 63        | 18        | 53        | 13        |
| Bifenox              | 68              | 18        | 72        | 15        | 54        | 13        | 61        | 2         | 29        | 28        | 34        | 18        | 49        | 19        | 63        | 13        | 47        | 19        | 54        | 7         | 51        | 12        | 48        | 25        |
| Bixafen              | 64              | 10        | 60        | 7         | 62        | 12        | 66        | 5         | 57        | 13        | 53        | 13        | 71        | 7         | 78        | 7         | 44        | 15        | 52        | 11        | 69        | 13        | 68        | 8         |
| Boscalid             | 123             | 15        | 90        | 13        | 98        | 4         | 69        | 6         | 37        | 13        | 39        | 8         | 87        | 9         | 72        | 6         | 89        | 14        | 51        | 9         | 114       | 18        | 76        | 5         |
| Bupirimate           | 68              | 12        | 60        | 13        | 63        | 9         | 61        | 3         | 50        | 4         | 48        | 5         | 73        | 5         | 71        | 4         | 52        | 5         | 52        | 5         | 62        | 25        | 62        | 5         |
| Buprofezin           | 58              | 6         | 65        | 6         | 68        | 4         | 67        | 4         | 62        | 4         | 60        | 2         | 74        | 7         | 76        | 4         | 63        | 5         | 62        | 5         | 62        | 18        | 61        | 6         |
| Chlorfenvinphos      | 66              | 19        | 70        | 9         | 57        | 5         | 53        | 3         | 40        | 7         | 44        | 4         | 66        | 7         | 71        | 7         | 45        | 5         | 45        | 4         | 72        | 12        | 69        | 7         |
| Chlorobromuron       | 61              | 13        | 74        | 8         | 53        | 13        | 58        | 1         | 48        | 4         | 45        | 4         | 55        | 9         | 54        | 3         | 47        | 4         | 46        | 4         | 58        | 22        | 49        | 7         |
| Chlorfluaazuron      | 72              | 8         | 82        | 11        | 67        | 15        | 72        | 1         | 48        | 12        | 59        | 7         | 44        | 11        | 42        | 2         | 58        | 5         | 70        | 7         | 82        | 18        | 77        | 5         |

|                          |    |    |    |    |    |    |    |   |    |    |    |    |     |    |     |    |    |    |    |    |    |    |    |    |
|--------------------------|----|----|----|----|----|----|----|---|----|----|----|----|-----|----|-----|----|----|----|----|----|----|----|----|----|
| Chlorpyrifos             | 59 | 6  | 61 | 10 | 59 | 6  | 57 | 5 | 54 | 4  | 45 | 7  | 76  | 7  | 72  | 2  | 53 | 2  | 54 | 5  | 59 | 14 | 57 | 7  |
| Chlorpyrifos-methyl      | 64 | 22 | 58 | 15 | 57 | 15 | 76 | 9 | 54 | 14 | 60 | 7  | 75  | 11 | 72  | 6  | 59 | 19 | 70 | 8  | 47 | 19 | 70 | 9  |
| Cinosulfuron             | 50 | 9  | 60 | 4  | 28 | 4  | 29 | 4 | 16 | 5  | 22 | 5  | 114 | 4  | 118 | 4  | 34 | 5  | 35 | 6  | 80 | 11 | 79 | 6  |
| Climbazole               | 64 | 7  | 56 | 9  | 49 | 7  | 48 | 3 | 29 | 6  | 35 | 7  | 81  | 10 | 74  | 5  | 37 | 7  | 39 | 6  | 64 | 29 | 57 | 6  |
| Clodinafop-propargyl     | 71 | 13 | 77 | 12 | 62 | 7  | 63 | 3 | 42 | 7  | 44 | 6  | 79  | 8  | 92  | 3  | 49 | 6  | 52 | 5  | 75 | 18 | 79 | 7  |
| Clofentezine             | 61 | 10 | 70 | 4  | 72 | 13 | 76 | 3 | 54 | 3  | 51 | 5  | 45  | 11 | 53  | 8  | 58 | 2  | 63 | 10 | 49 | 13 | 53 | 16 |
| Cloquintocet-mexyl       | 66 | 1  | 70 | 8  | 71 | 10 | 70 | 2 | 62 | 4  | 62 | 2  | 74  | 4  | 76  | 3  | 63 | 3  | 63 | 6  | 59 | 21 | 56 | 4  |
| Coumaphos                | 61 | 9  | 83 | 11 | 59 | 8  | 57 | 2 | 37 | 11 | 45 | 2  | 66  | 9  | 72  | 6  | 51 | 7  | 48 | 3  | 75 | 11 | 79 | 6  |
| Coumatetralyl            | 45 | 6  | 48 | 11 | 53 | 8  | 49 | 6 | 46 | 3  | 46 | 2  | 70  | 5  | 67  | 6  | 36 | 6  | 34 | 4  | 54 | 27 | 50 | 6  |
| Crufomate                | 65 | 10 | 75 | 9  | 83 | 12 | 81 | 3 | 63 | 13 | 63 | 2  | 91  | 11 | 95  | 7  | 67 | 3  | 69 | 6  | 63 | 27 | 59 | 6  |
| Cyanazine                | 49 | 8  | 56 | 5  | 77 | 6  | 72 | 4 | 28 | 19 | 37 | 4  | 80  | 5  | 98  | 3  | 67 | 4  | 58 | 4  | 61 | 12 | 66 | 5  |
| Cycloxydim               | 61 | 5  | 61 | 9  | 57 | 15 | 53 | 5 | 55 | 7  | 54 | 2  | 67  | 5  | 68  | 6  | 48 | 4  | 50 | 5  | 52 | 13 | 50 | 7  |
| Cyflumetofen             | 76 | 20 | 77 | 4  | 85 | 12 | 75 | 5 | 82 | 22 | 56 | 11 | 100 | 11 | 87  | 4  | 81 | 2  | 76 | 7  | 85 | 26 | 77 | 8  |
| Cymiazole                | 37 | 8  | 36 | 3  | 40 | 7  | 38 | 3 | 42 | 5  | 38 | 2  | 50  | 4  | 44  | 2  | 33 | 6  | 30 | 5  | 45 | 7  | 38 | 2  |
| Cyproconazole            | 85 | 5  | 81 | 11 | 59 | 10 | 53 | 3 | 64 | 6  | 53 | 9  | 83  | 6  | 85  | 5  | 57 | 5  | 51 | 5  | 63 | 17 | 49 | 8  |
| Cyprodinil               | 63 | 5  | 29 | 1  | 68 | 18 | 60 | 4 | 42 | 6  | 45 | 2  | 116 | 20 | 29  | 13 | 57 | 8  | 52 | 7  | 0  | /  | 44 | 7  |
| Demeton-S-methyl sulfone | 48 | 2  | 49 | 5  | 61 | 7  | 59 | 1 | 50 | 4  | 51 | 3  | 59  | 2  | 57  | 4  | 57 | 2  | 57 | 5  | 57 | 10 | 51 | 7  |
| Desmetryn                | 45 | 3  | 49 | 8  | 41 | 5  | 39 | 4 | 13 | 8  | 17 | 4  | 61  | 4  | 68  | 2  | 32 | 2  | 29 | 6  | 48 | 12 | 38 | 6  |
| Diafenthiuron            | 73 | 6  | 79 | 11 | 57 | 18 | 56 | 3 | 95 | 12 | 96 | 3  | 70  | 4  | 74  | 2  | 45 | 2  | 45 | 7  | 63 | 18 | 50 | 5  |
| Dialifos                 | 58 | 17 | 64 | 11 | 52 | 15 | 61 | 7 | 34 | 22 | 49 | 7  | 57  | 7  | 63  | 8  | 48 | 11 | 52 | 6  | 64 | 12 | 60 | 8  |
| Diazinon                 | 57 | 11 | 54 | 11 | 71 | 9  | 70 | 7 | 57 | 4  | 58 | 12 | 72  | 1  | 60  | 4  | 61 | 2  | 62 | 6  | 76 | 13 | 73 | 7  |
| Diclofop-methyl          | 63 | 15 | 62 | 7  | 57 | 13 | 61 | 5 | 42 | 16 | 45 | 6  | 63  | 8  | 61  | 4  | 48 | 8  | 57 | 7  | 67 | 20 | 61 | 6  |
| Diethofencarb            | 60 | 4  | 62 | 7  | 58 | 8  | 55 | 5 | 40 | 8  | 43 | 4  | 86  | 1  | 95  | 4  | 46 | 8  | 44 | 8  | 59 | 14 | 51 | 5  |
| Difenoconazole           | 79 | 13 | 86 | 6  | 76 | 13 | 72 | 3 | 81 | 14 | 61 | 5  | 86  | 11 | 97  | 6  | 68 | 3  | 66 | 5  | 79 | 17 | 66 | 6  |
| Di flufenican            | 70 | 8  | 74 | 7  | 70 | 8  | 62 | 7 | 43 | 10 | 51 | 20 | 58  | 9  | 75  | 10 | 63 | 4  | 56 | 16 | 71 | 23 | 81 | 13 |
| Dimethachlor             | 58 | 11 | 61 | 12 | 61 | 7  | 61 | 5 | 42 | 3  | 49 | 6  | 68  | 5  | 64  | 4  | 48 | 2  | 50 | 6  | 71 | 31 | 70 | 9  |
| Dimethenamid             | 58 | 15 | 65 | 16 | 59 | 9  | 59 | 4 | 50 | 8  | 43 | 1  | 70  | 9  | 73  | 5  | 46 | 5  | 48 | 6  | 59 | 20 | 60 | 9  |
| Dimethomorph             | 83 | 12 | 86 | 6  | 62 | 9  | 57 | 2 | 31 | 7  | 37 | 6  | 81  | 5  | 88  | 9  | 50 | 8  | 46 | 5  | 73 | 21 | 72 | 1  |
| Dimoxystrobin            | 66 | 13 | 70 | 9  | 68 | 11 | 66 | 8 | 46 | 28 | 42 | 4  | 76  | 14 | 84  | 8  | 52 | 8  | 55 | 5  | 72 | 21 | 74 | 6  |

|                       |     |    |     |    |    |    |    |    |     |    |     |    |     |    |     |    |    |    |    |    |     |    |     |    |
|-----------------------|-----|----|-----|----|----|----|----|----|-----|----|-----|----|-----|----|-----|----|----|----|----|----|-----|----|-----|----|
| Dioxathion            | 72  | 7  | 78  | 6  | 70 | 10 | 71 | 4  | 54  | 4  | 60  | 3  | 69  | 7  | 73  | 4  | 60 | 5  | 64 | 5  | 69  | 21 | 57  | 5  |
| Dipropetryn           | 45  | 8  | 56  | 13 | 57 | 3  | 52 | 2  | 55  | 9  | 52  | 6  | 86  | 9  | 80  | 3  | 51 | 4  | 47 | 2  | 57  | 14 | 47  | 3  |
| Ditalimphos           | 49  | 14 | 54  | 7  | 54 | 6  | 46 | 3  | 47  | 7  | 47  | 4  | 72  | 7  | 78  | 5  | 50 | 5  | 47 | 5  | 58  | 17 | 54  | 7  |
| Emamectin Ba          | 85  | 6  | 94  | 9  | 77 | 2  | 74 | 4  | 102 | 9  | 97  | 6  | 92  | 6  | 93  | 3  | 68 | 9  | 67 | 6  | 101 | 18 | 94  | 6  |
| Emamectin Bb          | 72  | 9  | 71  | 9  | 93 | 14 | 73 | 4  | 100 | 6  | 103 | 4  | 89  | 4  | 86  | 3  | 75 | 10 | 61 | 5  | 102 | 18 | 87  | 9  |
| Epoxiconazole         | 59  | 15 | 61  | 17 | 72 | 13 | 72 | 9  | 57  | 10 | 53  | 6  | 104 | 7  | 83  | 5  | 62 | 18 | 55 | 10 | 66  | 16 | 61  | 6  |
| Etaconazole           | 78  | 21 | 78  | 18 | 55 | 20 | 55 | 5  | 46  | 29 | 50  | 12 | 117 | 11 | 96  | 8  | 65 | 17 | 53 | 7  | 0   | /  | 51  | 14 |
| Ethion                | 56  | 4  | 61  | 6  | 64 | 5  | 63 | 3  | 61  | 5  | 59  | 3  | 61  | 7  | 58  | 4  | 54 | 2  | 56 | 5  | 71  | 15 | 62  | 7  |
| Ethofumesate          | 64  | 14 | 72  | 9  | 0  | /  | 87 | 15 | 53  | 17 | 52  | 4  | 72  | 13 | 85  | 4  | 0  | /  | 0  | /  | 75  | 14 | 55  | 11 |
| Ethoprophos           | 48  | 17 | 63  | 9  | 63 | 6  | 58 | 3  | 57  | 8  | 53  | 9  | 83  | 6  | 87  | 7  | 52 | 6  | 49 | 5  | 60  | 20 | 52  | 12 |
| Etoxazole             | 61  | 7  | 64  | 10 | 59 | 11 | 60 | 4  | 54  | 4  | 56  | 4  | 40  | 11 | 29  | 8  | 50 | 2  | 50 | 5  | 68  | 22 | 61  | 5  |
| Etrimfos              | 63  | 15 | 55  | 19 | 67 | 10 | 71 | 5  | 62  | 10 | 64  | 10 | 74  | 3  | 72  | 5  | 61 | 14 | 66 | 7  | 68  | 21 | 64  | 6  |
| Famoxadone            | 70  | 18 | 77  | 17 | 73 | 12 | 74 | 13 | 47  | 7  | 60  | 12 | 87  | 13 | 86  | 5  | 64 | 6  | 63 | 6  | 78  | 33 | 73  | 4  |
| Fenamiphos            | 54  | 14 | 75  | 15 | 76 | 7  | 73 | 5  | 54  | 9  | 62  | 5  | 80  | 7  | 80  | 2  | 59 | 3  | 61 | 2  | 61  | 20 | 48  | 5  |
| Fenarimol             | 69  | 15 | 77  | 16 | 74 | 14 | 65 | 2  | 74  | 5  | 63  | 4  | 95  | 14 | 92  | 5  | 53 | 19 | 59 | 5  | 49  | 46 | 91  | 7  |
| Fenazaquin            | 62  | 6  | 54  | 9  | 58 | 9  | 54 | 2  | 48  | 16 | 43  | 8  | 58  | 5  | 37  | 2  | 53 | 2  | 49 | 6  | 56  | 19 | 41  | 5  |
| Fenbuconazole         | 76  | 14 | 83  | 18 | 71 | 12 | 63 | 6  | 47  | 10 | 46  | 5  | 79  | 8  | 84  | 8  | 57 | 9  | 58 | 7  | 70  | 28 | 74  | 14 |
| Fenpropidin           | 72  | 8  | 74  | 8  | 60 | 2  | 54 | 3  | 50  | 5  | 46  | 4  | 89  | 8  | 92  | 4  | 60 | 6  | 52 | 3  | 73  | 22 | 63  | 7  |
| Fenpropimorph         | 61  | 7  | 84  | 8  | 60 | 8  | 52 | 5  | 34  | 6  | 46  | 12 | 87  | 5  | 89  | 4  | 50 | 2  | 46 | 4  | 49  | 15 | 51  | 7  |
| Fenpyroximate         | 72  | 7  | 73  | 7  | 63 | 19 | 66 | 5  | 53  | 5  | 57  | 1  | 52  | 5  | 51  | 4  | 55 | 2  | 60 | 5  | 75  | 24 | 71  | 5  |
| Fensulfothion         | 53  | 4  | 63  | 8  | 49 | 4  | 43 | 2  | 28  | 7  | 30  | 3  | 61  | 5  | 85  | 9  | 40 | 1  | 37 | 7  | 59  | 27 | 54  | 8  |
| Fensulfothion-oxon    | 33  | 5  | 31  | 5  | 34 | 5  | 29 | 2  | 20  | 5  | 20  | 4  | 77  | 6  | 75  | 6  | 28 | 3  | 22 | 5  | 39  | 8  | 29  | 4  |
| Fensulfothion-sulfone | 91  | 7  | 97  | 8  | 50 | 5  | 48 | 6  | 12  | 17 | 28  | 5  | 76  | 3  | 78  | 5  | 40 | 5  | 40 | 5  | 66  | 21 | 65  | 5  |
| Fenthion              | 59  | 13 | 61  | 9  | 67 | 8  | 71 | 7  | 62  | 8  | 60  | 7  | 70  | 5  | 70  | 5  | 61 | 7  | 64 | 5  | 61  | 22 | 55  | 10 |
| Fenthion sulfone      | 44  | 16 | 41  | 13 | 30 | 17 | 48 | 15 | 23  | 5  | 27  | 3  | 62  | 16 | 81  | 4  | 24 | 17 | 38 | 11 | 64  | 19 | 56  | 6  |
| Fenthion sulfoxide    | 43  | 2  | 37  | 7  | 38 | 2  | 35 | 4  | 24  | 9  | 26  | 5  | 49  | 2  | 45  | 4  | 35 | 5  | 29 | 7  | 51  | 20 | 43  | 5  |
| Flamprop-isopropyl    | 59  | 6  | 58  | 13 | 62 | 9  | 60 | 5  | 47  | 5  | 46  | 5  | 73  | 7  | 82  | 9  | 49 | 6  | 50 | 7  | 74  | 13 | 69  | 18 |
| Flazasulfuron         | 102 | 12 | 125 | 13 | 32 | 7  | 32 | 4  | 20  | 16 | 23  | 11 | 127 | 7  | 142 | 3  | 41 | 5  | 41 | 7  | 100 | 35 | 110 | 4  |
| Florasulam            | 57  | 5  | 63  | 8  | 57 | 6  | 58 | 7  | 21  | 14 | 25  | 7  | 88  | 5  | 98  | 5  | 74 | 7  | 46 | 4  | 92  | 15 | 90  | 9  |
| Flubendiamide         | 69  | 19 | 79  | 16 | 61 | 19 | 70 | 9  | 78  | 7  | 49  | 4  | 79  | 15 | 116 | 16 | 57 | 18 | 59 | 4  | 77  | 23 | 95  | 13 |

|                   |     |    |     |    |     |    |    |    |    |    |    |    |     |    |     |    |     |    |    |    |     |    |     |    |
|-------------------|-----|----|-----|----|-----|----|----|----|----|----|----|----|-----|----|-----|----|-----|----|----|----|-----|----|-----|----|
| Flucycloxuron     | 80  | 7  | 86  | 11 | 79  | 17 | 79 | 6  | 47 | 15 | 69 | 3  | 64  | 4  | 63  | 6  | 65  | 7  | 71 | 7  | 82  | 21 | 79  | 4  |
| Flufenacet        | 66  | 14 | 75  | 9  | 90  | 14 | 79 | 12 | 49 | 4  | 57 | 30 | 72  | 7  | 73  | 4  | 72  | 2  | 68 | 7  | 105 | 27 | 103 | 4  |
| Flufenoxuron      | 71  | 4  | 68  | 8  | 70  | 29 | 79 | 4  | 59 | 15 | 62 | 6  | 54  | 6  | 53  | 3  | 54  | 7  | 70 | 10 | 77  | 26 | 74  | 4  |
| Fluopicolide      | 64  | 8  | 76  | 10 | 52  | 14 | 46 | 14 | 32 | 9  | 32 | 13 | 51  | 5  | 71  | 5  | 41  | 6  | 35 | 6  | 64  | 17 | 52  | 10 |
| Flurochloridon    | 76  | 8  | 86  | 2  | 55  | 16 | 57 | 4  | 36 | 11 | 37 | 6  | 66  | 5  | 56  | 10 | 44  | 10 | 49 | 3  | 57  | 21 | 50  | 12 |
| Flurprimidol      | 82  | 20 | 80  | 6  | 71  | 13 | 64 | 6  | 59 | 6  | 54 | 8  | 85  | 7  | 86  | 4  | 60  | 8  | 57 | 2  | 70  | 44 | 59  | 12 |
| Flurtamone        | 65  | 7  | 63  | 6  | 55  | 8  | 52 | 2  | 36 | 5  | 35 | 7  | 84  | 4  | 77  | 6  | 43  | 3  | 42 | 5  | 62  | 19 | 50  | 4  |
| Flusilazole       | 64  | 16 | 75  | 10 | 80  | 8  | 75 | 4  | 66 | 10 | 64 | 8  | 78  | 8  | 68  | 6  | 64  | 3  | 61 | 7  | 61  | 14 | 54  | 6  |
| Fluxapyroxad      | 70  | 6  | 79  | 11 | 57  | 11 | 55 | 4  | 28 | 4  | 32 | 6  | 56  | 12 | 87  | 9  | 38  | 9  | 44 | 6  | 68  | 18 | 61  | 12 |
| Fluxastrobin      | 40  | 30 | 73  | 9  | 52  | 8  | 51 | 10 | 51 | 5  | 45 | 5  | 73  | 6  | 86  | 9  | 35  | 10 | 40 | 6  | 57  | 24 | 59  | 12 |
| Fonofos           | 68  | 13 | 55  | 19 | 88  | 13 | 68 | 9  | 74 | 9  | 58 | 6  | 81  | 15 | 83  | 8  | 82  | 9  | 70 | 9  | 89  | 18 | 58  | 8  |
| Foramsulfuron     | 93  | 7  | 107 | 8  | 17  | 10 | 17 | 2  | 14 | 8  | 14 | 3  | 145 | 4  | 145 | 5  | 42  | 4  | 39 | 3  | 85  | 20 | 66  | 8  |
| Forchlofenuron    | 67  | 10 | 58  | 5  | 71  | 3  | 67 | 3  | 0  | /  | 46 | 15 | 63  | 8  | 82  | 2  | 60  | 7  | 57 | 5  | 93  | 25 | 77  | 11 |
| Furmecyclox       | 50  | 5  | 51  | 13 | 68  | 5  | 65 | 3  | 52 | 5  | 68 | 6  | 65  | 6  | 60  | 10 | 59  | 2  | 55 | 5  | 55  | 10 | 49  | 7  |
| Haloxypop-methyl  | 70  | 6  | 71  | 7  | 69  | 11 | 70 | 4  | 43 | 6  | 47 | 2  | 76  | 6  | 78  | 5  | 58  | 3  | 61 | 4  | 75  | 16 | 77  | 10 |
| Heptenophos       | 102 | 14 | 58  | 9  | 60  | 13 | 62 | 8  | 47 | 5  | 47 | 8  | 77  | 7  | 61  | 7  | 47  | 18 | 47 | 5  | 71  | 27 | 55  | 7  |
| Hexazinone        | 37  | 5  | 37  | 6  | 34  | 4  | 32 | 3  | 21 | 3  | 20 | 4  | 46  | 5  | 50  | 4  | 30  | 4  | 26 | 6  | 42  | 13 | 35  | 6  |
| Hexythiazox       | 52  | 6  | 57  | 10 | 57  | 10 | 59 | 6  | 37 | 14 | 47 | 4  | 45  | 12 | 46  | 7  | 49  | 11 | 51 | 8  | 56  | 14 | 54  | 3  |
| Imazalil          | 47  | 5  | 45  | 6  | 55  | 7  | 52 | 5  | 44 | 8  | 43 | 7  | 82  | 5  | 75  | 7  | 45  | 8  | 41 | 6  | 69  | 12 | 62  | 8  |
| Imazosulfuron     | 107 | 17 | 116 | 11 | 55  | 7  | 48 | 12 | 37 | 9  | 32 | 2  | 107 | 10 | 103 | 4  | 82  | 8  | 54 | 8  | 131 | 24 | 118 | 5  |
| Imibenconazole    | 61  | 1  | 71  | 3  | 112 | 11 | 78 | 7  | 58 | 13 | 61 | 3  | 56  | 6  | 52  | 9  | 86  | 12 | 68 | 12 | 65  | 19 | 64  | 3  |
| Indoxacarb        | 103 | 12 | 102 | 9  | 91  | 15 | 85 | 5  | 46 | 11 | 77 | 8  | 106 | 3  | 108 | 9  | 88  | 7  | 80 | 8  | 117 | 20 | 83  | 2  |
| Ipconazole        | 80  | 7  | 81  | 5  | 71  | 18 | 74 | 6  | 52 | 10 | 63 | 6  | 116 | 4  | 117 | 7  | 105 | 8  | 81 | 8  | 72  | 23 | 67  | 6  |
| Isofenphos        | 61  | 6  | 61  | 5  | 91  | 11 | 80 | 6  | 40 | 9  | 46 | 3  | 77  | 5  | 81  | 9  | 83  | 4  | 74 | 8  | 64  | 16 | 62  | 4  |
| Isofenphos-methyl | 72  | 11 | 75  | 12 | 58  | 6  | 53 | 4  | 35 | 15 | 36 | 8  | 72  | 4  | 63  | 6  | 53  | 4  | 47 | 4  | 73  | 16 | 72  | 7  |
| Isopyrazam        | 67  | 9  | 73  | 8  | 70  | 10 | 65 | 2  | 54 | 9  | 55 | 5  | 78  | 8  | 83  | 6  | 62  | 5  | 59 | 4  | 80  | 16 | 72  | 3  |
| Isoxaflutole      | 104 | 5  | 94  | 6  | 73  | 7  | 64 | 6  | 63 | 4  | 44 | 4  | 168 | 7  | 143 | 3  | 79  | 8  | 69 | 6  | 112 | 21 | 99  | 6  |
| Kresoxim-methyl   | 70  | 16 | 67  | 11 | 72  | 6  | 66 | 4  | 58 | 15 | 50 | 8  | 84  | 10 | 71  | 5  | 53  | 10 | 56 | 4  | 66  | 14 | 64  | 4  |
| Linuron           | 51  | 6  | 54  | 11 | 61  | 13 | 56 | 3  | 46 | 8  | 48 | 6  | 66  | 6  | 58  | 7  | 46  | 11 | 43 | 5  | 75  | 10 | 54  | 6  |
| Malaoxon          | 37  | 3  | 41  | 7  | 49  | 6  | 36 | 2  | 36 | 1  | 23 | 3  | 64  | 6  | 59  | 3  | 45  | 3  | 31 | 7  | 25  | 17 | 45  | 6  |

|                    |     |    |     |    |    |    |    |   |    |    |    |    |     |    |    |    |    |    |    |    |     |    |    |    |
|--------------------|-----|----|-----|----|----|----|----|---|----|----|----|----|-----|----|----|----|----|----|----|----|-----|----|----|----|
| Malathion          | 64  | 8  | 81  | 9  | 68 | 8  | 64 | 3 | 43 | 9  | 48 | 2  | 75  | 3  | 76 | 7  | 58 | 4  | 54 | 3  | 68  | 21 | 60 | 3  |
| Mecarbam           | 64  | 6  | 51  | 4  | 48 | 8  | 46 | 4 | 38 | 8  | 37 | 4  | 74  | 10 | 73 | 1  | 39 | 10 | 37 | 5  | 64  | 14 | 66 | 11 |
| Mepanipyrin        | 50  | 11 | 49  | 8  | 72 | 7  | 54 | 2 | 52 | 3  | 49 | 5  | 66  | 5  | 81 | 9  | 57 | 4  | 46 | 8  | 47  | 11 | 44 | 6  |
| Metaflumizone      | 86  | 10 | 86  | 17 | 79 | 15 | 83 | 5 | 65 | 22 | 75 | 9  | 89  | 10 | 68 | 11 | 69 | 10 | 74 | 8  | 114 | 17 | 94 | 14 |
| Metalaxyl          | 65  | 5  | 59  | 3  | 63 | 7  | 55 | 3 | 41 | 9  | 41 | 7  | 95  | 5  | 92 | 7  | 53 | 2  | 44 | 5  | 80  | 24 | 65 | 5  |
| Metazachlor        | 38  | 16 | 56  | 7  | 49 | 7  | 53 | 4 | 34 | 6  | 36 | 5  | 67  | 5  | 67 | 4  | 42 | 4  | 43 | 4  | 57  | 14 | 44 | 8  |
| Methabenzthiazuron | 48  | 8  | 55  | 7  | 59 | 7  | 51 | 2 | 42 | 6  | 42 | 3  | 55  | 5  | 64 | 5  | 45 | 4  | 40 | 6  | 59  | 20 | 55 | 3  |
| Methidathion       | 38  | 18 | 60  | 4  | 50 | 15 | 57 | 6 | 45 | 5  | 42 | 8  | 45  | 6  | 60 | 5  | 40 | 4  | 49 | 4  | 49  | 21 | 44 | 7  |
| Methiocarb         | 56  | 3  | 68  | 10 | 64 | 10 | 61 | 4 | 59 | 7  | 60 | 3  | 65  | 2  | 72 | 3  | 49 | 4  | 48 | 4  | 87  | 9  | 63 | 5  |
| Methoprotryne      | 51  | 6  | 57  | 6  | 58 | 10 | 55 | 6 | 43 | 4  | 46 | 7  | 81  | 4  | 84 | 7  | 49 | 5  | 47 | 6  | 60  | 13 | 58 | 6  |
| Methoxyfenozide    | 53  | 18 | 72  | 12 | 50 | 9  | 50 | 4 | 37 | 6  | 31 | 5  | 54  | 13 | 72 | 7  | 38 | 5  | 42 | 7  | 61  | 14 | 58 | 6  |
| Metobromuron       | 55  | 7  | 45  | 9  | 43 | 5  | 38 | 6 | 31 | 8  | 33 | 4  | 65  | 9  | 67 | 7  | 37 | 6  | 32 | 6  | 60  | 9  | 36 | 5  |
| Metolachlor        | 52  | 13 | 59  | 10 | 62 | 6  | 60 | 3 | 46 | 1  | 50 | 3  | 78  | 6  | 78 | 3  | 50 | 8  | 51 | 4  | 56  | 19 | 58 | 6  |
| Metrafenone        | 58  | 6  | 60  | 13 | 60 | 8  | 58 | 3 | 35 | 6  | 41 | 3  | 59  | 8  | 69 | 8  | 47 | 5  | 49 | 3  | 65  | 18 | 60 | 8  |
| Napropamid         | 53  | 19 | 70  | 12 | 58 | 9  | 59 | 1 | 67 | 9  | 63 | 7  | 65  | 16 | 84 | 8  | 54 | 6  | 50 | 6  | 57  | 18 | 52 | 8  |
| Norflurazon        | 53  | 5  | 50  | 6  | 49 | 8  | 50 | 4 | 31 | 15 | 30 | 10 | 55  | 9  | 69 | 6  | 36 | 5  | 40 | 7  | 49  | 13 | 37 | 6  |
| Oxadiazyl          | 77  | 14 | 67  | 10 | 63 | 8  | 61 | 6 | 57 | 18 | 60 | 9  | 67  | 11 | 75 | 3  | 59 | 9  | 54 | 8  | 79  | 27 | 64 | 19 |
| Oxycarboxim        | 27  | 3  | 24  | 4  | 24 | 8  | 29 | 3 | 22 | 5  | 28 | 5  | 31  | 6  | 33 | 2  | 21 | 7  | 26 | 6  | 31  | 7  | 27 | 2  |
| Paclobutrazol      | 108 | 5  | 105 | 14 | 76 | 10 | 59 | 5 | 50 | 12 | 60 | 11 | 102 | 6  | 97 | 5  | 53 | 12 | 53 | 8  | 60  | 26 | 55 | 12 |
| Pencycuron         | 54  | 4  | 85  | 10 | 65 | 12 | 62 | 6 | 47 | 7  | 44 | 8  | 74  | 5  | 80 | 9  | 58 | 5  | 55 | 7  | 70  | 19 | 79 | 7  |
| Penthiopyrad       | 67  | 9  | 67  | 18 | 68 | 8  | 61 | 3 | 52 | 7  | 54 | 15 | 70  | 6  | 71 | 4  | 56 | 12 | 51 | 4  | 79  | 24 | 83 | 7  |
| Pethoxamid         | 52  | 9  | 52  | 6  | 71 | 10 | 64 | 8 | 68 | 7  | 61 | 7  | 85  | 11 | 90 | 5  | 55 | 6  | 54 | 10 | 64  | 21 | 59 | 6  |
| Phenthoate         | 58  | 12 | 62  | 17 | 62 | 9  | 65 | 5 | 46 | 7  | 46 | 5  | 72  | 9  | 74 | 5  | 53 | 6  | 55 | 4  | 70  | 18 | 73 | 9  |
| Phosalone          | 56  | 16 | 61  | 8  | 58 | 13 | 56 | 4 | 38 | 11 | 46 | 5  | 54  | 7  | 55 | 3  | 50 | 5  | 48 | 6  | 59  | 17 | 56 | 5  |
| Phosmet            | 40  | 6  | 48  | 5  | 45 | 42 | 55 | 8 | 34 | 23 | 32 | 6  | 51  | 14 | 54 | 6  | 37 | 9  | 40 | 13 | 58  | 28 | 65 | 9  |
| Phosphamidon       | 44  | 8  | 58  | 9  | 42 | 7  | 40 | 3 | 42 | 3  | 37 | 5  | 70  | 4  | 69 | 8  | 38 | 4  | 34 | 7  | 58  | 12 | 44 | 4  |
| Phoxim             | 56  | 10 | 68  | 7  | 60 | 6  | 56 | 4 | 59 | 2  | 52 | 7  | 75  | 3  | 73 | 4  | 54 | 3  | 54 | 5  | 60  | 20 | 62 | 6  |
| Picolinafen        | 56  | 3  | 59  | 7  | 58 | 15 | 61 | 4 | 33 | 8  | 47 | 4  | 59  | 6  | 65 | 4  | 51 | 7  | 51 | 8  | 65  | 17 | 67 | 5  |
| Picoxystrobin      | 54  | 2  | 58  | 13 | 58 | 7  | 57 | 4 | 41 | 3  | 41 | 2  | 79  | 3  | 75 | 3  | 54 | 5  | 53 | 3  | 69  | 24 | 73 | 11 |
| Pinoxaden          | 73  | 5  | 78  | 9  | 65 | 7  | 52 | 4 | 53 | 4  | 49 | 7  | 88  | 5  | 86 | 8  | 53 | 3  | 47 | 3  | 64  | 21 | 57 | 3  |

|                    |     |    |    |    |    |    |    |   |    |    |    |    |     |    |     |    |    |    |    |   |     |    |     |    |
|--------------------|-----|----|----|----|----|----|----|---|----|----|----|----|-----|----|-----|----|----|----|----|---|-----|----|-----|----|
| Piperonyl Butoxyde | 62  | 12 | 77 | 8  | 65 | 10 | 66 | 2 | 63 | 3  | 55 | 4  | 85  | 5  | 82  | 3  | 66 | 8  | 57 | 6 | 83  | 17 | 71  | 9  |
| Pirimiphos-ethyl   | 57  | 7  | 60 | 7  | 65 | 6  | 63 | 3 | 56 | 1  | 50 | 3  | 66  | 11 | 68  | 5  | 61 | 2  | 58 | 6 | 64  | 19 | 64  | 3  |
| Pirimiphos-methyl  | 63  | 5  | 62 | 7  | 69 | 7  | 62 | 4 | 63 | 2  | 52 | 7  | 91  | 10 | 70  | 3  | 64 | 3  | 60 | 5 | 68  | 28 | 63  | 8  |
| Prochloraz         | 63  | 8  | 68 | 12 | 60 | 7  | 55 | 4 | 42 | 9  | 48 | 9  | 65  | 9  | 67  | 1  | 51 | 5  | 45 | 7 | 57  | 21 | 59  | 6  |
| Profenofos         | 62  | 9  | 58 | 4  | 61 | 9  | 56 | 4 | 46 | 12 | 46 | 5  | 72  | 8  | 75  | 4  | 51 | 4  | 53 | 6 | 57  | 20 | 51  | 4  |
| Prometon           | 37  | 8  | 43 | 10 | 55 | 8  | 56 | 4 | 31 | 3  | 25 | 3  | 67  | 5  | 67  | 8  | 45 | 3  | 46 | 6 | 60  | 17 | 47  | 6  |
| Prometryn          | 68  | 4  | 71 | 5  | 69 | 5  | 69 | 2 | 50 | 5  | 48 | 3  | 67  | 3  | 64  | 4  | 56 | 8  | 56 | 6 | 57  | 27 | 59  | 6  |
| Propaphos          | 65  | 11 | 66 | 11 | 71 | 14 | 69 | 5 | 50 | 4  | 48 | 3  | 83  | 6  | 83  | 14 | 57 | 5  | 58 | 4 | 65  | 17 | 60  | 10 |
| Propquinazid       | 51  | 7  | 50 | 9  | 44 | 19 | 44 | 3 | 33 | 12 | 36 | 2  | 32  | 7  | 32  | 2  | 36 | 6  | 39 | 5 | 52  | 18 | 48  | 4  |
| Propargite         | 64  | 6  | 67 | 9  | 67 | 9  | 68 | 3 | 69 | 9  | 61 | 3  | 55  | 6  | 58  | 4  | 59 | 3  | 58 | 5 | 73  | 18 | 67  | 5  |
| Propazine          | 52  | 7  | 55 | 6  | 83 | 4  | 73 | 3 | 53 | 5  | 53 | 6  | 53  | 6  | 53  | 6  | 63 | 4  | 61 | 5 | 52  | 20 | 47  | 5  |
| Propiconazole      | 58  | 11 | 61 | 10 | 58 | 4  | 55 | 6 | 53 | 10 | 55 | 6  | 70  | 5  | 73  | 6  | 54 | 3  | 51 | 4 | 60  | 16 | 55  | 4  |
| Propyzamide        | 82  | 13 | 75 | 11 | 72 | 9  | 68 | 2 | 49 | 12 | 53 | 4  | 70  | 10 | 69  | 7  | 59 | 3  | 56 | 6 | 75  | 30 | 56  | 8  |
| Prosulfocarb       | 73  | 14 | 63 | 16 | 84 | 8  | 71 | 5 | 69 | 4  | 64 | 6  | 68  | 7  | 68  | 8  | 66 | 8  | 61 | 4 | 77  | 26 | 62  | 6  |
| Pyraclostrobin     | 58  | 8  | 65 | 7  | 58 | 7  | 55 | 5 | 47 | 6  | 45 | 4  | 67  | 6  | 66  | 3  | 51 | 4  | 49 | 4 | 67  | 19 | 68  | 5  |
| Pyrazophos         | 69  | 1  | 74 | 8  | 62 | 10 | 62 | 2 | 47 | 11 | 49 | 5  | 85  | 9  | 90  | 7  | 52 | 3  | 55 | 4 | 77  | 21 | 72  | 8  |
| Pyridaben          | 63  | 7  | 65 | 10 | 54 | 16 | 54 | 2 | 31 | 12 | 34 | 4  | 40  | 4  | 39  | 4  | 46 | 4  | 48 | 5 | 66  | 24 | 58  | 6  |
| Pyridafenthion     | 74  | 19 | 90 | 8  | 59 | 14 | 55 | 6 | 39 | 16 | 35 | 4  | 77  | 12 | 78  | 6  | 47 | 8  | 44 | 5 | 68  | 19 | 64  | 8  |
| Pyridate           | 67  | 5  | 59 | 6  | 45 | 10 | 37 | 6 | 42 | 3  | 23 | 4  | 50  | 4  | 36  | 3  | 83 | 5  | 66 | 6 | 64  | 19 | 54  | 6  |
| Rimsulfuron        | 48  | 7  | 54 | 11 | 18 | 6  | 20 | 2 | 13 | 17 | 14 | 4  | 72  | 4  | 77  | 5  | 27 | 11 | 26 | 8 | 76  | 13 | 55  | 6  |
| Saflufenacil       | 102 | 14 | 96 | 18 | 68 | 9  | 72 | 8 | 41 | 13 | 43 | 10 | 141 | 14 | 154 | 10 | 75 | 11 | 78 | 5 | 141 | 16 | 149 | 25 |
| Spinosyn-A         | 71  | 6  | 70 | 13 | 60 | 7  | 60 | 5 | 72 | 4  | 71 | 3  | 70  | 8  | 69  | 8  | 49 | 4  | 50 | 7 | 74  | 18 | 67  | 4  |
| Spirotetramat      | 87  | 9  | 91 | 14 | 63 | 10 | 56 | 6 | 50 | 31 | 54 | 6  | 156 | 4  | 144 | 7  | 51 | 4  | 46 | 5 | 94  | 17 | 84  | 5  |
| Spiroxamine        | 73  | 10 | 80 | 9  | 70 | 10 | 56 | 3 | 56 | 7  | 53 | 5  | 96  | 5  | 96  | 6  | 64 | 2  | 55 | 5 | 69  | 24 | 68  | 11 |
| Sulfotep           | 61  | 16 | 62 | 20 | 59 | 9  | 59 | 3 | 46 | 16 | 53 | 6  | 83  | 11 | 83  | 5  | 48 | 10 | 50 | 8 | 64  | 15 | 56  | 5  |
| Tebufenozide       | 57  | 14 | 65 | 11 | 65 | 11 | 62 | 4 | 39 | 8  | 41 | 4  | 67  | 2  | 65  | 7  | 56 | 8  | 49 | 7 | 73  | 25 | 70  | 2  |
| Tebufenpyrad       | 61  | 10 | 63 | 8  | 73 | 15 | 71 | 5 | 47 | 13 | 55 | 6  | 68  | 11 | 73  | 4  | 66 | 7  | 62 | 7 | 62  | 23 | 64  | 3  |
| Tepraloxydim       | 71  | 3  | 72 | 7  | 51 | 6  | 45 | 8 | 35 | 13 | 37 | 11 | 63  | 7  | 73  | 4  | 44 | 9  | 42 | 3 | 72  | 24 | 64  | 7  |
| Terbufos           | 72  | 7  | 72 | 11 | 74 | 16 | 64 | 5 | 69 | 13 | 66 | 14 | 63  | 8  | 63  | 9  | 71 | 13 | 66 | 5 | 89  | 23 | 65  | 5  |
| Thiobencarb        | 65  | 8  | 65 | 11 | 69 | 12 | 62 | 7 | 55 | 8  | 57 | 13 | 72  | 6  | 68  | 5  | 57 | 12 | 58 | 4 | 65  | 20 | 60  | 6  |

|             |     |    |     |    |    |    |    |   |    |    |    |    |    |    |    |    |    |    |    |   |    |    |     |    |
|-------------|-----|----|-----|----|----|----|----|---|----|----|----|----|----|----|----|----|----|----|----|---|----|----|-----|----|
| Tolfenpyrad | 64  | 4  | 72  | 5  | 73 | 14 | 74 | 3 | 41 | 12 | 52 | 5  | 64 | 8  | 69 | 3  | 63 | 5  | 67 | 5 | 69 | 24 | 70  | 4  |
| Tralkoxydim | 60  | 6  | 61  | 6  | 60 | 14 | 56 | 3 | 44 | 8  | 48 | 4  | 29 | 14 | 56 | 9  | 53 | 6  | 53 | 8 | 55 | 19 | 55  | 5  |
| Triadimefon | 124 | 9  | 109 | 8  | 74 | 7  | 76 | 4 | 59 | 10 | 63 | 6  | 81 | 12 | 82 | 8  | 66 | 4  | 65 | 7 | 68 | 22 | 57  | 4  |
| Triallate   | 104 | 14 | 62  | 10 | 64 | 19 | 63 | 8 | 64 | 14 | 58 | 7  | 37 | 18 | 65 | 9  | 62 | 13 | 56 | 8 | 0  | /  | 59  | 11 |
| Tridemorph  | 56  | 12 | 66  | 17 | 64 | 10 | 52 | 8 | 52 | 3  | 54 | 5  | 94 | 9  | 84 | 11 | 70 | 7  | 54 | 3 | 73 | 13 | 61  | 5  |
| Triforine   | 78  | 17 | 79  | 5  | 63 | 8  | 54 | 4 | 34 | 22 | 39 | 18 | 75 | 8  | 80 | 1  | 50 | 14 | 49 | 9 | 32 | 44 | 101 | 17 |
| Zoxamide    | 55  | 4  | 52  | 19 | 63 | 12 | 61 | 3 | 58 | 6  | 39 | 2  | 71 | 7  | 74 | 13 | 52 | 9  | 52 | 6 | 72 | 24 | 67  | 8  |

Table S3: LODs, LOQs and ME of the different extraction/cleanup QuEChERS method in the rapeseed samples.

| Molecules            | Without clean up |                |           | Freezing       |                |        | C18/PSA        |                |        | EMR-lipid      |                |        | Z-Sep          |                |        | Z-Sep+         |                |        |
|----------------------|------------------|----------------|-----------|----------------|----------------|--------|----------------|----------------|--------|----------------|----------------|--------|----------------|----------------|--------|----------------|----------------|--------|
|                      | LOD<br>(µg/kg)   | LOQ<br>(µg/kg) | ME<br>(%) | LOD<br>(µg/kg) | LOQ<br>(µg/kg) | ME (%) |
| Acephate             | 1.06             | 3.18           | -59       | 1.01           | 3.02           | 2      | 0.92           | 2.77           | -46    | 0.84           | 2.52           | -14    | 1.13           | 3.40           | -71    | 0.82           | 2.46           | -50    |
| Acetochlor           | 1.52             | 4.57           | -39       | 1.09           | 3.28           | -27    | 1.10           | 3.30           | -12    | 0.84           | 2.51           | -14    | 1.25           | 3.76           | -41    | 1.05           | 3.14           | -60    |
| Acibenzolar-S-methyl | 0.76             | 2.27           | -22       | 1.26           | 3.77           | 8      | 1.22           | 3.67           | -6     | 1.33           | 3.99           | -13    | 1.96           | 5.87           | -31    | /              | /              | -72    |
| Alachlor             | 1.07             | 3.21           | -36       | 1.01           | 3.03           | -19    | 1.09           | 3.28           | 4      | 0.81           | 2.43           | -37    | 1.24           | 3.71           | -28    | 1.19           | 3.58           | -60    |
| Aldicarb sulfone     | 0.73             | 2.18           | -41       | 1.50           | 4.49           | -17    | 0.74           | 2.22           | -10    | 0.65           | 1.94           | -37    | /              | /              | -42    | 0.64           | 1.93           | -40    |
| Ametoctradin         | 0.82             | 2.45           | -21       | 0.87           | 2.61           | -9     | 1.19           | 3.58           | 34     | 0.86           | 2.59           | -22    | 1.03           | 3.08           | -20    | 1.17           | 3.50           | -60    |
| Ametryn              | 1.40             | 4.20           | -44       | 1.64           | 4.92           | -10    | /              | /              | 7      | 1.04           | 3.11           | -37    | 1.94           | 5.82           | -30    | 1.35           | 4.05           | -65    |
| Anilofos             | 1.05             | 3.14           | -12       | 1.31           | 3.93           | -13    | 1.81           | 5.43           | 37     | 1.00           | 2.99           | -6     | 1.62           | 4.87           | -2     | 0.92           | 2.77           | -48    |
| Azaconazole          | 0.75             | 2.25           | -24       | 1.19           | 3.58           | -9     | 1.90           | 5.69           | 38     | 1.01           | 3.04           | -11    | 1.46           | 4.38           | -11    | 1.11           | 3.34           | -65    |
| Azinphos-methyl      | 0.68             | 2.04           | -34       | 1.31           | 3.93           | 14     | /              | /              | 19     | 0.93           | 2.79           | -32    | 1.69           | 5.06           | -13    | 1.14           | 3.42           | -49    |
| Aziprotryne          | 0.91             | 2.73           | -24       | 0.85           | 2.54           | 4      | 1.07           | 3.22           | 32     | 0.83           | 2.49           | -22    | 1.08           | 3.24           | -20    | 1.01           | 3.03           | -68    |
| Azoxystrobin         | 0.90             | 2.69           | -22       | 1.06           | 3.18           | -10    | 1.41           | 4.24           | 8      | 0.89           | 2.67           | -24    | 1.31           | 3.94           | -21    | 1.13           | 3.39           | -58    |
| Barban               | 0.73             | 2.19           | -24       | 0.92           | 2.75           | -6     | 0.90           | 2.71           | 16     | 1.27           | 3.82           | -4     | 0.90           | 2.69           | -5     | /              | /              | -63    |
| Benalaxyl            | 1.04             | 3.13           | -15       | 0.93           | 2.78           | 4      | 1.18           | 3.54           | 37     | 0.74           | 2.21           | -15    | 1.07           | 3.20           | -1     | 0.96           | 2.89           | -48    |
| Benoxacor            | 1.08             | 3.25           | -17       | 1.02           | 3.07           | -1     | 1.64           | 4.91           | 12     | 0.91           | 2.72           | -40    | 1.36           | 4.09           | -12    | 1.06           | 3.17           | -48    |
| Bifenox              | 0.99             | 2.96           | 14        | 1.23           | 3.70           | 52     | /              | /              | 99     | 1.36           | 4.08           | 30     | 1.43           | 4.29           | 31     | 1.30           | 3.89           | -54    |
| Bixafen              | 1.05             | 3.15           | -25       | 1.07           | 3.20           | 13     | 1.18           | 3.54           | 21     | 0.93           | 2.80           | -10    | 1.51           | 4.54           | -6     | 0.97           | 2.91           | -53    |
| Boscalid             | 0.82             | 2.45           | -29       | 0.68           | 2.03           | 2      | 1.80           | 5.40           | 24     | 0.76           | 2.29           | -6     | 0.75           | 2.25           | -25    | 0.58           | 1.75           | -55    |
| Bupirimate           | 0.99             | 2.96           | -25       | 1.06           | 3.17           | -15    | 1.33           | 3.99           | 14     | 0.91           | 2.73           | -37    | 1.27           | 3.81           | -12    | 1.07           | 3.22           | -51    |
| Buprofezin           | 1.15             | 3.44           | -77       | 0.98           | 2.94           | 5      | 1.08           | 3.23           | 29     | 0.90           | 2.69           | -11    | 1.05           | 3.16           | -9     | 1.07           | 3.21           | -53    |
| Chlorfenvinphos      | 1.01             | 3.03           | -37       | 1.16           | 3.49           | -14    | 1.65           | 4.95           | 19     | 1.01           | 3.02           | -21    | 1.49           | 4.48           | -23    | 0.93           | 2.79           | -59    |

|                              |      |      |     |      |      |     |      |      |     |      |      |     |      |      |     |      |      |     |
|------------------------------|------|------|-----|------|------|-----|------|------|-----|------|------|-----|------|------|-----|------|------|-----|
| Chlorobromuro                |      |      |     |      |      |     |      |      |     |      |      |     |      |      |     |      |      |     |
| n                            | 1.09 | 3.28 | -31 | 1.25 | 3.74 | -30 | 1.38 | 4.14 | -10 | 1.21 | 3.62 | -43 | 1.41 | 4.22 | -36 | 1.14 | 3.43 | -73 |
| Chlorfluazuron               | 0.92 | 2.76 | -52 | 1.00 | 3.00 | -48 | 1.40 | 4.19 | -35 | 1.50 | 4.50 | -34 | 1.15 | 3.45 | -53 | 0.82 | 2.45 | -76 |
| Chlorpyrifos                 | 1.13 | 3.40 | -15 | 1.12 | 3.37 | 1   | 1.23 | 3.68 | 46  | 0.87 | 2.62 | -8  | 1.25 | 3.76 | -9  | 1.13 | 3.39 | -58 |
| Chlorpyrifos-<br>methyl      | 1.05 | 3.14 | -30 | 1.18 | 3.53 | -23 | 1.22 | 3.67 | -10 | 0.88 | 2.65 | -21 | 1.12 | 3.36 | -60 | 1.43 | 4.29 | -69 |
| Cinosulfuron                 | 1.33 | 4.00 | -29 | /    | /    | 32  | /    | /    | 54  | 0.58 | 1.75 | 2   | 1.99 | 5.96 | 21  | 0.84 | 2.51 | -34 |
| Climbazole                   | 1.05 | 3.14 | -43 | 1.37 | 4.11 | 5   | /    | /    | 29  | 0.82 | 2.46 | -28 | 1.78 | 5.34 | -15 | 1.03 | 3.10 | -59 |
| Clodinafop-<br>propargyl     | 0.93 | 2.80 | -4  | 1.08 | 3.23 | 13  | 1.60 | 4.79 | 25  | 0.85 | 2.54 | -7  | 1.35 | 4.06 | -12 | 0.89 | 2.67 | -42 |
| Clofentezine                 | 1.09 | 3.26 | -26 | 0.93 | 2.78 | 5   | 1.24 | 3.73 | 28  | 1.47 | 4.40 | -21 | 1.15 | 3.46 | -22 | 1.35 | 4.06 | -57 |
| Cloquintocet-<br>mexyl       | 1.01 | 3.04 | 70  | 0.94 | 2.82 | 18  | 1.08 | 3.24 | 90  | 0.91 | 2.72 | 51  | 1.05 | 3.16 | 58  | 1.13 | 3.39 | 87  |
| Coumaphos                    | 1.10 | 3.29 | -36 | 1.12 | 3.37 | -16 | 1.79 | 5.37 | 22  | 1.00 | 3.01 | -20 | 1.32 | 3.95 | -15 | 0.89 | 2.66 | -56 |
| Coumatetralyl                | 1.50 | 4.49 | -30 | 1.25 | 3.76 | -5  | 1.46 | 4.39 | 10  | 0.95 | 2.84 | -37 | 1.84 | 5.53 | -20 | 1.23 | 3.69 | -58 |
| Crufomate                    | 1.02 | 3.07 | -13 | 0.81 | 2.42 | 4   | 1.07 | 3.20 | 37  | 0.74 | 2.21 | -11 | 0.99 | 2.98 | -14 | 1.05 | 3.15 | -51 |
| Cyanazine                    | 1.36 | 4.09 | -38 | 0.87 | 2.60 | -5  | /    | /    | 3   | 0.84 | 2.51 | -40 | 1.00 | 2.99 | -28 | 1.09 | 3.26 | -57 |
| Cycloxydim                   | 1.10 | 3.30 | -60 | 1.18 | 3.53 | 5   | 1.22 | 3.65 | 60  | 0.99 | 2.98 | 1   | 1.39 | 4.17 | -13 | 1.29 | 3.86 | -48 |
| Cyflumetofen                 | 0.88 | 2.64 | -27 | 0.78 | 2.35 | -23 | 0.82 | 2.45 | 24  | 0.67 | 2.01 | -22 | 0.82 | 2.46 | -28 | 0.79 | 2.36 | -62 |
| Cymiazole                    | 1.79 | 5.36 | -62 | 1.65 | 4.95 | -31 | 1.59 | 4.77 | -33 | 1.34 | 4.03 | -59 | 2.04 | 6.11 | -50 | 1.48 | 4.43 | -67 |
| Cyproconazole                | 0.78 | 2.34 | -32 | 1.13 | 3.40 | 5   | 1.04 | 3.12 | 20  | 0.80 | 2.40 | -17 | 1.16 | 3.49 | -20 | 1.06 | 3.18 | -57 |
| Cyprodinil                   | 1.06 | 3.18 | -18 | 0.98 | 2.94 | 2   | 1.57 | 4.71 | 31  | 0.57 | 1.72 | -20 | 1.17 | 3.52 | -18 | /    | /    | -59 |
| Demeton-S-<br>methyl sulfone | 1.40 | 4.20 | -55 | 1.09 | 3.28 | -16 | 1.35 | 4.04 | -9  | 1.14 | 3.41 | -39 | 1.17 | 3.50 | -40 | 1.17 | 3.50 | -61 |
| Desmetryn                    | 1.49 | 4.46 | -29 | 1.61 | 4.84 | 0   | /    | /    | 17  | 1.09 | 3.26 | -20 | 2.06 | 6.19 | -25 | 1.38 | 4.14 | -55 |
| Diafenthiuron                | 0.91 | 2.73 | 26  | 1.17 | 3.52 | 22  | 0.70 | 2.11 | 22  | 0.95 | 2.86 | 15  | 1.49 | 4.47 | 27  | 1.07 | 3.20 | -46 |
| Dialifos                     | 1.14 | 3.43 | -30 | 1.27 | 3.82 | -2  | 1.94 | 5.81 | 28  | 1.16 | 3.49 | -14 | 1.39 | 4.16 | -14 | 1.05 | 3.14 | -66 |
| Diazinon                     | 1.17 | 3.50 | -21 | 0.94 | 2.83 | -7  | 1.17 | 3.50 | 28  | 0.92 | 2.77 | -21 | 1.08 | 3.25 | -9  | 0.88 | 2.63 | -54 |
| Diclofop-<br>methyl          | 1.05 | 3.16 | -91 | 1.18 | 3.54 | -58 | 1.59 | 4.78 | -86 | 1.06 | 3.18 | -91 | 1.39 | 4.18 | -91 | 1.00 | 3.00 | -95 |
| Diethofencarb                | 1.11 | 3.33 | -25 | 1.15 | 3.46 | -13 | 1.65 | 4.95 | -4  | 0.77 | 2.32 | -19 | 1.44 | 4.33 | -21 | 1.13 | 3.38 | -54 |
| Difenoconazole               | 0.85 | 2.54 | -41 | 0.87 | 2.62 | 1   | 0.83 | 2.48 | 38  | 0.77 | 2.32 | 5   | 0.97 | 2.92 | -13 | 0.84 | 2.52 | -54 |
| Diflufenican                 | 0.95 | 2.86 | 50  | 0.95 | 2.86 | 25  | 1.57 | 4.70 | 62  | 1.14 | 3.43 | 10  | 1.06 | 3.17 | -37 | 0.93 | 2.80 | -48 |

|                       |      |      |     |      |      |     |      |      |     |      |      |     |      |      |     |      |      |     |
|-----------------------|------|------|-----|------|------|-----|------|------|-----|------|------|-----|------|------|-----|------|------|-----|
| Dimethachlor          | 1.16 | 3.47 | -33 | 1.09 | 3.28 | -18 | 1.58 | 4.75 | 10  | 0.98 | 2.93 | -29 | 1.39 | 4.18 | -18 | 0.94 | 2.81 | -56 |
| Dimethenamid          | 1.15 | 3.46 | -33 | 1.12 | 3.37 | -14 | 1.34 | 4.02 | 0   | 0.95 | 2.84 | -29 | 1.45 | 4.34 | -26 | 1.12 | 3.37 | -58 |
| Dimethomorph          | 0.80 | 2.40 | 53  | 1.08 | 3.24 | 13  | 2.16 | 6.49 | 41  | 0.83 | 2.48 | 11  | 1.34 | 4.03 | 2   | 0.91 | 2.74 | -47 |
| Dimoxystrobin         | 1.00 | 3.01 | -16 | 0.98 | 2.95 | -10 | 1.44 | 4.33 | 30  | 0.88 | 2.65 | -13 | 1.27 | 3.81 | -13 | 0.93 | 2.79 | -55 |
| Dioxathion            | 0.93 | 2.78 | -23 | 0.95 | 2.86 | -7  | 1.24 | 3.73 | 24  | 0.97 | 2.90 | -22 | 1.11 | 3.34 | -14 | 0.97 | 2.91 | -56 |
| Dipropetryn           | 1.49 | 4.46 | -28 | 1.16 | 3.48 | 2   | 1.22 | 3.65 | 29  | 0.78 | 2.33 | -24 | 1.30 | 3.89 | -11 | 1.17 | 3.51 | -50 |
| Ditalimphos           | 1.37 | 4.12 | -32 | 1.23 | 3.70 | -11 | 1.42 | 4.25 | 21  | 0.93 | 2.79 | -32 | 1.34 | 4.03 | -13 | 1.15 | 3.45 | -49 |
| Eamectin Ba           | 0.79 | 2.36 | -51 | 0.86 | 2.59 | 21  | 0.65 | 1.96 | 71  | 0.72 | 2.17 | -9  | 0.98 | 2.93 | 12  | 0.66 | 1.99 | -47 |
| Eamectin Bb           | 0.93 | 2.78 | -8  | 0.71 | 2.14 | 19  | 0.66 | 1.99 | 58  | 0.75 | 2.25 | -6  | 0.89 | 2.66 | 8   | 0.66 | 1.97 | -52 |
| Epoxiconazole         | 1.12 | 3.37 | -9  | 0.93 | 2.78 | 34  | 1.17 | 3.51 | 48  | 0.64 | 1.92 | -17 | 1.08 | 3.23 | 18  | 1.01 | 3.04 | -51 |
| Etaconazole           | 0.86 | 2.57 | -13 | 1.21 | 3.64 | 6   | 1.44 | 4.33 | 43  | 0.57 | 1.71 | 2   | 1.03 | 3.09 | -17 | /    | /    | -70 |
| Ethion                | 1.19 | 3.56 | -25 | 1.05 | 3.14 | 2   | 1.10 | 3.30 | 24  | 1.10 | 3.30 | -24 | 1.23 | 3.69 | -17 | 0.93 | 2.80 | -57 |
| Ethofumesate          | 1.05 | 3.15 | -42 | /    | /    | -24 | 1.25 | 3.75 | -6  | 0.93 | 2.79 | -33 | /    | /    | -32 | 0.89 | 2.66 | -58 |
| Ethoprophos           | 1.37 | 4.12 | -22 | 1.06 | 3.17 | 18  | 1.18 | 3.53 | 36  | 0.80 | 2.41 | -31 | 1.29 | 3.88 | -7  | 1.11 | 3.33 | -46 |
| Etoazole              | 1.09 | 3.26 | 133 | 1.13 | 3.40 | 75  | 1.24 | 3.73 | 181 | 1.66 | 4.98 | 117 | 1.33 | 3.99 | 147 | 0.98 | 2.93 | 37  |
| Etrimfos              | 1.07 | 3.20 | -22 | 1.00 | 2.99 | -1  | 1.07 | 3.20 | 24  | 0.90 | 2.70 | -11 | 1.10 | 3.29 | -8  | 0.98 | 2.95 | -58 |
| Famoxadone            | 0.95 | 2.86 | -42 | 0.91 | 2.73 | -25 | 1.41 | 4.23 | 17  | 0.77 | 2.30 | -24 | 1.04 | 3.11 | -28 | 0.86 | 2.57 | -61 |
| Fenamiphos            | 1.24 | 3.72 | -11 | 0.88 | 2.63 | -3  | 1.22 | 3.67 | 28  | 0.83 | 2.49 | -28 | 1.12 | 3.36 | -12 | 1.09 | 3.26 | -49 |
| Fenarimol             | 0.97 | 2.91 | 16  | 0.90 | 2.71 | 26  | 0.90 | 2.70 | 86  | 0.70 | 2.11 | -5  | 1.25 | 3.75 | 36  | 1.37 | 4.10 | -27 |
| Fenazaquin            | 1.08 | 3.25 | -20 | 1.16 | 3.47 | -6  | 1.40 | 4.19 | 24  | 1.14 | 3.42 | -21 | 1.26 | 3.77 | -18 | 1.18 | 3.55 | -58 |
| Fenbuconazole         | 0.88 | 2.63 | 31  | 0.94 | 2.83 | 15  | 1.42 | 4.27 | 60  | 0.84 | 2.52 | -20 | 1.18 | 3.53 | 5   | 0.95 | 2.86 | -37 |
| Fenpropidin           | 0.92 | 2.76 | -4  | 1.11 | 3.32 | 12  | 1.34 | 4.03 | 52  | 0.75 | 2.24 | -4  | 1.12 | 3.35 | 0   | 0.91 | 2.74 | -47 |
| Fenpropimorph         | 1.09 | 3.26 | -22 | 1.12 | 3.36 | -12 | 1.95 | 5.85 | 26  | 0.77 | 2.30 | -17 | 1.32 | 3.96 | -21 | 1.35 | 4.04 | -46 |
| Fenpyroximate         | 0.92 | 2.77 | 19  | 1.05 | 3.15 | 26  | 1.26 | 3.77 | 55  | 1.29 | 3.86 | 16  | 1.22 | 3.66 | 17  | 0.89 | 2.66 | -39 |
| Fensulfothion         | 1.26 | 3.78 | -41 | 1.35 | 4.04 | -72 | /    | /    | -50 | 1.09 | 3.27 | -28 | 1.65 | 4.96 | -22 | 1.12 | 3.36 | -54 |
| Fensulfothion-oxon    | 2.01 | 6.03 | -28 | 1.94 | 5.81 | -12 | /    | /    | 27  | 0.86 | 2.59 | -18 | /    | /    | -9  | 1.72 | 5.16 | -58 |
| Fensulfothion-sulfone | 0.74 | 2.21 | -30 | 1.33 | 3.99 | 7   | /    | /    | 22  | 0.88 | 2.63 | -18 | 1.67 | 5.00 | -17 | 1.02 | 3.05 | -46 |
| Fenthion              | 1.13 | 3.40 | -10 | 0.99 | 2.97 | -2  | 1.08 | 3.23 | 37  | 0.95 | 2.86 | 5   | 1.10 | 3.29 | -14 | 1.10 | 3.30 | -56 |
| Fenthion sulfone      | 1.51 | 4.52 | -46 | 2.19 | 6.57 | -34 | /    | /    | -14 | 1.08 | 3.23 | -42 | /    | /    | -45 | 1.03 | 3.10 | -60 |

|                |      |      |     |      |      |     |      |      |     |      |      |     |      |      |     |      |      |     |
|----------------|------|------|-----|------|------|-----|------|------|-----|------|------|-----|------|------|-----|------|------|-----|
| Fenthion       |      |      |     |      |      |     |      |      |     |      |      |     |      |      |     |      |      |     |
| sulfoxide      | 1.55 | 4.66 | -46 | 1.75 | 5.24 | -30 | /    | /    | -10 | 1.36 | 4.07 | -41 | 1.89 | 5.66 | -37 | 1.30 | 3.89 | -59 |
| Flamprop-      |      |      |     |      |      |     |      |      |     |      |      |     |      |      |     |      |      |     |
| isopropyl      | 1.13 | 3.39 | -5  | 1.07 | 3.20 | 8   | 1.42 | 4.25 | 48  | 0.92 | 2.75 | -8  | 1.37 | 4.12 | 5   | 0.90 | 2.70 | -55 |
| Flazasulfuron  | 0.68 | 2.03 | 16  | 2.07 | 6.21 | 10  | /    | /    | 60  | 0.85 | 2.55 | 30  | 1.64 | 4.91 | 19  | 0.67 | 2.00 | -45 |
| Florasulam     | 1.17 | 3.51 | 16  | 1.17 | 3.52 | 87  | /    | /    | 90  | 0.75 | 2.26 | 6   | 0.90 | 2.69 | 23  | 0.73 | 2.18 | -17 |
| Flubendiamide  | 0.97 | 2.92 | -18 | 1.09 | 3.27 | -9  | 0.85 | 2.55 | 23  | 0.84 | 2.53 | -12 | 1.17 | 3.50 | -14 | 0.86 | 2.59 | -60 |
| Flucycloxuron  | 0.84 | 2.51 | -15 | 0.84 | 2.53 | 10  | 1.43 | 4.29 | 42  | 1.04 | 3.11 | -12 | 1.02 | 3.06 | -12 | 0.81 | 2.43 | -57 |
| Flufenacet     | 1.00 | 3.01 | 43  | 0.74 | 2.22 | 32  | 1.36 | 4.07 | 81  | 0.93 | 2.78 | -1  | 0.93 | 2.79 | 17  | 0.64 | 1.91 | -50 |
| Flufenoxuron   | 0.94 | 2.81 | -31 | 0.95 | 2.86 | -2  | 1.13 | 3.38 | 20  | 1.23 | 3.69 | -22 | 1.23 | 3.70 | -23 | 0.86 | 2.58 | -58 |
| Fluopicolide   | 1.05 | 3.14 | -45 | 1.29 | 3.88 | 14  | 2.08 | 6.24 | 35  | 1.30 | 3.91 | -6  | 1.63 | 4.88 | -9  | 1.04 | 3.13 | -50 |
| Flurochloridon | 0.88 | 2.63 | -30 | 1.22 | 3.66 | -7  | 1.84 | 5.51 | 3   | 1.01 | 3.04 | -58 | 1.53 | 4.60 | -23 | 1.16 | 3.49 | -57 |
| Flurprimidol   | 0.81 | 2.43 | -41 | 0.94 | 2.83 | -8  | 1.13 | 3.40 | 14  | 0.78 | 2.34 | -17 | 1.11 | 3.34 | -19 | 0.95 | 2.86 | -61 |
| Flurtamone     | 1.03 | 3.08 | -21 | 1.21 | 3.63 | -10 | 1.87 | 5.61 | 19  | 0.80 | 2.39 | -22 | 1.54 | 4.63 | -18 | 1.07 | 3.22 | -54 |
| Flusilazole    | 1.05 | 3.15 | 18  | 0.83 | 2.49 | 8   | 1.00 | 3.01 | 72  | 0.86 | 2.58 | 7   | 1.04 | 3.13 | 0   | 1.10 | 3.29 | -44 |
| Fluxapyroxad   | 0.95 | 2.85 | -30 | 1.17 | 3.50 | -10 | /    | /    | 10  | 1.19 | 3.56 | -21 | 1.75 | 5.26 | -24 | 0.98 | 2.93 | -57 |
| Fluxastrobin   | 1.66 | 4.98 | -20 | 1.28 | 3.85 | -10 | 1.31 | 3.93 | 6   | 0.91 | 2.72 | -45 | 1.92 | 5.75 | -27 | 1.17 | 3.52 | -57 |
| Fonofos        | 0.98 | 2.95 | -23 | 0.76 | 2.28 | -1  | 0.90 | 2.69 | 83  | 0.82 | 2.47 | 29  | 0.81 | 2.44 | -5  | 0.75 | 2.26 | -56 |
| Foramsulfuron  | 0.71 | 2.14 | -89 | /    | /    | -91 | /    | /    | -85 | /    | /    | -37 | 1.58 | 4.75 | -89 | 0.78 | 2.35 | -93 |
| Forchlofenuron | 0.99 | 2.97 | -32 | 0.95 | 2.84 | -5  | /    | /    | 14  | 1.05 | 3.15 | -18 | 1.11 | 3.34 | -29 | 0.71 | 2.14 | -61 |
| Furmecyclox    | 1.34 | 4.03 | -24 | 0.97 | 2.92 | 0   | 1.27 | 3.81 | 32  | 1.03 | 3.08 | -18 | 1.14 | 3.41 | -8  | 1.21 | 3.64 | -50 |
| Haloxyfop-     |      |      |     |      |      |     |      |      |     |      |      |     |      |      |     |      |      |     |
| methyl         | 0.95 | 2.86 | -55 | 0.96 | 2.88 | 5   | 1.56 | 4.68 | 55  | 0.88 | 2.64 | -10 | 1.15 | 3.45 | 2   | 0.89 | 2.66 | -63 |
| Heptenophos    | 0.68 | 2.04 | -45 | 1.11 | 3.32 | 9   | 1.42 | 4.27 | 17  | 0.87 | 2.61 | -36 | 1.42 | 4.26 | -16 | 0.94 | 2.82 | -50 |
| Hexazinone     | 1.78 | 5.34 | -45 | 1.98 | 5.95 | -26 | /    | /    | -8  | 1.44 | 4.33 | -41 | /    | /    | -34 | 1.59 | 4.77 | -59 |
| Hexythiazox    | 1.27 | 3.82 | -25 | 1.17 | 3.52 | -1  | 1.80 | 5.39 | 35  | 1.47 | 4.41 | -16 | 1.35 | 4.06 | -14 | 1.19 | 3.56 | -57 |
| Imazalil       | 1.42 | 4.25 | -37 | 1.21 | 3.64 | -6  | 1.51 | 4.53 | 8   | 0.81 | 2.44 | -44 | 1.49 | 4.47 | -26 | 0.96 | 2.89 | -62 |
| Imazosulfuron  | 0.71 | 2.14 | -3  | 1.21 | 3.64 | -15 | 1.81 | 5.44 | 21  | 0.63 | 1.88 | -9  | 0.81 | 2.44 | -9  | 0.87 | 2.61 | -70 |
| Imibenconazole | 1.09 | 3.26 | -6  | 0.60 | 1.79 | 14  | 1.15 | 3.45 | 64  | 1.19 | 3.58 | -8  | 0.78 | 2.33 | -3  | 1.03 | 3.08 | -51 |
| Indoxacarb     | 0.68 | 2.05 | 15  | 0.73 | 2.20 | 24  | 1.45 | 4.34 | 50  | 0.63 | 1.89 | -59 | 0.76 | 2.27 | 27  | 0.57 | 1.71 | -48 |
| Ipconazole     | 0.83 | 2.50 | 6   | 0.94 | 2.81 | 20  | 1.27 | 3.82 | 57  | 0.58 | 1.73 | -5  | 0.64 | 1.91 | -3  | 0.92 | 2.76 | -41 |
| Isofenphos     | 1.10 | 3.29 | -21 | 0.73 | 2.19 | -2  | 1.67 | 5.00 | -59 | 0.87 | 2.61 | -11 | 0.80 | 2.40 | -11 | 1.04 | 3.12 | -52 |

|                        |      |      |     |      |      |     |      |      |     |      |      |     |      |      |     |      |      |     |
|------------------------|------|------|-----|------|------|-----|------|------|-----|------|------|-----|------|------|-----|------|------|-----|
| Isofenphos-<br>methyl  | 0.93 | 2.78 | -20 | 1.14 | 3.42 | -8  | 1.90 | 5.71 | 40  | 0.92 | 2.77 | -19 | 1.27 | 3.80 | -9  | 0.91 | 2.74 | -52 |
| Isoprazam              | 1.00 | 3.00 | -17 | 0.95 | 2.85 | 6   | 1.23 | 3.70 | 44  | 0.85 | 2.55 | -7  | 1.08 | 3.24 | -15 | 0.83 | 2.49 | -57 |
| Isoxaflutole           | 0.70 | 2.09 | 19  | 0.91 | 2.73 | -42 | 1.06 | 3.19 | 6   | /    | /    | 0   | 0.84 | 2.53 | 2   | 0.59 | 1.78 | -38 |
| Kresoxim-<br>methyl    | 0.95 | 2.84 | -14 | 0.92 | 2.76 | 0   | 1.14 | 3.43 | 46  | 0.79 | 2.38 | -14 | 1.26 | 3.77 | -13 | 1.02 | 3.05 | -53 |
| Linuron                | 1.30 | 3.91 | -34 | 1.09 | 3.27 | -6  | 1.44 | 4.31 | 23  | 1.01 | 3.03 | -20 | 1.46 | 4.39 | -7  | 0.88 | 2.65 | -65 |
| Malaoxon               | 1.78 | 5.35 | -47 | 1.35 | 4.05 | -38 | 1.85 | 5.54 | -28 | 1.04 | 3.12 | -45 | 1.48 | 4.45 | -49 | /    | /    | -70 |
| Malathion              | 1.04 | 3.12 | -23 | 0.98 | 2.95 | 12  | 1.53 | 4.60 | 2   | 0.89 | 2.66 | -36 | 1.16 | 3.47 | -34 | 0.98 | 2.93 | -62 |
| Mecarbam               | 1.04 | 3.13 | -20 | 1.38 | 4.13 | 8   | 1.75 | 5.26 | 33  | 0.90 | 2.69 | -37 | 1.73 | 5.18 | 0   | 1.04 | 3.12 | -54 |
| Mepanipirim            | 1.34 | 4.03 | -27 | 0.93 | 2.78 | -4  | 1.27 | 3.82 | 39  | 1.01 | 3.02 | -26 | 1.17 | 3.51 | -24 | 1.42 | 4.26 | -47 |
| Metaflumizone          | 0.78 | 2.33 | -6  | 0.84 | 2.52 | 18  | 1.03 | 3.10 | 72  | 0.75 | 2.26 | -8  | 0.97 | 2.90 | -7  | 0.59 | 1.76 | -51 |
| Metalaxyl              | 1.03 | 3.10 | -32 | 1.05 | 3.16 | 1   | 1.65 | 4.94 | 25  | 0.70 | 2.10 | -33 | 1.27 | 3.81 | -17 | 0.83 | 2.50 | -56 |
| Metazachlor            | 1.75 | 5.25 | -40 | 1.35 | 4.05 | -10 | 1.95 | 5.86 | 11  | 1.00 | 3.00 | -30 | 1.59 | 4.78 | -29 | 1.17 | 3.50 | -54 |
| Methabenzthia<br>zuron | 1.38 | 4.13 | -32 | 1.12 | 3.36 | -5  | 1.58 | 4.73 | -49 | 1.22 | 3.65 | -30 | 1.48 | 4.43 | -20 | 1.13 | 3.38 | -59 |
| Methidathion           | 1.76 | 5.27 | -49 | 1.34 | 4.02 | -14 | 1.48 | 4.44 | 0   | 1.49 | 4.48 | -40 | 1.68 | 5.04 | -20 | 1.36 | 4.09 | -54 |
| Methiocarb             | 1.18 | 3.55 | -27 | 1.04 | 3.12 | -18 | 1.13 | 3.39 | 0   | 1.02 | 3.06 | -28 | 1.35 | 4.05 | -30 | 0.77 | 2.30 | -68 |
| Methoprotryne          | 1.31 | 3.93 | -25 | 1.14 | 3.43 | -8  | 1.55 | 4.65 | 28  | 0.82 | 2.46 | -26 | 1.37 | 4.10 | -21 | 1.11 | 3.32 | -58 |
| Methoxyfenozi<br>de    | 1.26 | 3.77 | -20 | 1.34 | 4.01 | 20  | 1.81 | 5.43 | 44  | 1.24 | 3.73 | -3  | 1.73 | 5.20 | -13 | 1.09 | 3.28 | -47 |
| Metobromuron           | 1.21 | 3.64 | -44 | 1.55 | 4.64 | -16 | 2.16 | 6.49 | -7  | 1.03 | 3.09 | -41 | 1.82 | 5.46 | -44 | 1.11 | 3.32 | -63 |
| Metolachlor            | 1.27 | 3.82 | -24 | 1.08 | 3.24 | -19 | 1.44 | 4.33 | 16  | 0.85 | 2.56 | -23 | 1.32 | 3.97 | -19 | 1.18 | 3.55 | -57 |
| Metrafenone            | 1.16 | 3.47 | -16 | 1.12 | 3.36 | 9   | 1.90 | 5.69 | 45  | 1.14 | 3.41 | -8  | 1.42 | 4.26 | -1  | 1.03 | 3.09 | -54 |
| Napropamid             | 1.26 | 3.79 | 22  | 1.14 | 3.43 | -1  | 1.00 | 2.99 | 37  | 1.02 | 3.06 | -33 | 1.24 | 3.73 | -7  | 1.17 | 3.51 | -51 |
| Norflurazon            | 1.25 | 3.75 | -66 | 1.37 | 4.11 | -52 | 2.15 | 6.46 | -35 | 1.20 | 3.61 | -42 | 1.85 | 5.56 | -57 | 1.36 | 4.09 | -77 |
| Oxadiazyl              | 0.87 | 2.60 | -17 | 1.06 | 3.18 | -12 | 1.16 | 3.49 | 11  | 0.99 | 2.97 | -11 | 1.12 | 3.37 | -2  | 0.84 | 2.53 | -57 |
| Oxycarboxim            | /    | /    | -80 | /    | /    | -71 | /    | /    | -72 | 2.13 | 6.39 | -59 | /    | /    | -71 | 2.13 | 6.40 | -82 |
| Paclobutrazol          | 0.72 | 2.17 | 10  | 0.88 | 2.64 | 17  | 1.32 | 3.96 | 59  | 0.65 | 1.96 | -1  | 1.25 | 3.75 | 9   | 1.11 | 3.32 | -62 |
| Pencycuron             | 1.24 | 3.73 | -29 | 1.03 | 3.10 | -1  | 1.42 | 4.25 | 29  | 0.90 | 2.69 | -12 | 1.15 | 3.44 | -17 | 0.95 | 2.86 | -54 |
| Penthiopyrad           | 1.00 | 3.00 | -13 | 0.98 | 2.95 | -1  | 1.28 | 3.84 | 30  | 0.95 | 2.86 | -6  | 1.20 | 3.59 | -10 | 0.84 | 2.52 | -48 |
| Pethoxamid             | 1.27 | 3.82 | -16 | 0.93 | 2.80 | -5  | 0.98 | 2.95 | 18  | 0.78 | 2.34 | -43 | 1.21 | 3.64 | -17 | 1.04 | 3.11 | -58 |
| Phenthoate             | 1.14 | 3.43 | -19 | 1.07 | 3.21 | 14  | 1.44 | 4.32 | 39  | 0.92 | 2.77 | -19 | 1.26 | 3.77 | -6  | 0.95 | 2.84 | -60 |

|                       |      |      |     |      |      |     |      |      |     |      |      |     |      |      |     |      |      |     |
|-----------------------|------|------|-----|------|------|-----|------|------|-----|------|------|-----|------|------|-----|------|------|-----|
| Phosalone             | 1.20 | 3.59 | -32 | 1.15 | 3.45 | -4  | 1.74 | 5.23 | 36  | 1.24 | 3.71 | -17 | 1.32 | 3.97 | -11 | 1.13 | 3.39 | -64 |
| Phosmet               | 1.66 | 4.99 | -93 | 1.47 | 4.41 | -68 | 1.94 | 5.83 | -84 | 1.29 | 3.88 | -49 | 1.79 | 5.36 | -88 | 1.16 | 3.47 | -94 |
| Phosphamidon          | 1.52 | 4.57 | -52 | 1.57 | 4.72 | -35 | 1.60 | 4.79 | -13 | 0.95 | 2.86 | -44 | 1.74 | 5.22 | -46 | 1.14 | 3.43 | -70 |
| Phoxim                | 1.19 | 3.57 | -31 | 1.11 | 3.32 | 1   | 1.14 | 3.41 | 24  | 0.89 | 2.67 | -13 | 1.24 | 3.73 | -13 | 1.10 | 3.31 | -62 |
| Picolinafen           | 1.20 | 3.59 | -14 | 1.15 | 3.44 | 12  | 2.04 | 6.12 | 30  | 1.12 | 3.37 | -16 | 1.32 | 3.95 | -5  | 1.03 | 3.10 | -51 |
| Picoxystrobin         | 1.23 | 3.70 | -20 | 1.16 | 3.47 | 0   | 1.62 | 4.86 | 29  | 0.84 | 2.53 | -12 | 1.24 | 3.73 | -22 | 0.96 | 2.89 | -41 |
| Pinoxaden             | 0.92 | 2.75 | -11 | 1.03 | 3.10 | -5  | 1.26 | 3.77 | 32  | 0.76 | 2.28 | -8  | 1.26 | 3.77 | -48 | 1.03 | 3.10 | -48 |
| Piperonyl<br>Butoxyde | 1.07 | 3.21 | -10 | 1.02 | 3.07 | 2   | 1.06 | 3.18 | 28  | 0.78 | 2.35 | -8  | 1.01 | 3.02 | -8  | 0.80 | 2.41 | -16 |
| Pirimiphos-<br>ethyl  | 1.18 | 3.53 | -13 | 1.02 | 3.06 | 9   | 1.19 | 3.57 | 32  | 1.02 | 3.05 | -2  | 1.09 | 3.28 | -4  | 1.04 | 3.13 | -39 |
| Pirimiphos-<br>methyl | 1.06 | 3.18 | -31 | 0.96 | 2.88 | -7  | 1.05 | 3.16 | 21  | 0.73 | 2.20 | -18 | 1.04 | 3.13 | -21 | 0.99 | 2.96 | -56 |
| Prochloraz            | 1.05 | 3.16 | -23 | 1.11 | 3.34 | -7  | 1.58 | 4.74 | 41  | 1.03 | 3.10 | -20 | 1.31 | 3.93 | 10  | 1.16 | 3.49 | -56 |
| Profenofos            | 1.08 | 3.24 | 10  | 1.10 | 3.29 | 32  | 1.44 | 4.33 | 53  | 0.93 | 2.79 | 1   | 1.31 | 3.94 | 3   | 1.17 | 3.51 | -48 |
| Prometon              | 1.79 | 5.37 | -37 | 1.22 | 3.67 | -9  | 2.15 | 6.46 | 11  | 1.00 | 2.99 | -29 | 1.47 | 4.40 | -26 | 1.11 | 3.32 | -63 |
| Prometryn             | 0.99 | 2.96 | -14 | 0.97 | 2.90 | -2  | 1.34 | 4.03 | 20  | 0.99 | 2.98 | -21 | 1.19 | 3.56 | -23 | 1.17 | 3.51 | -53 |
| Propaphos             | 1.02 | 3.07 | -10 | 0.94 | 2.81 | 3   | 1.34 | 4.03 | 47  | 0.81 | 2.42 | 1   | 1.17 | 3.51 | 8   | 1.02 | 3.06 | -39 |
| Propquinazid          | 1.31 | 3.92 | -4  | 1.53 | 4.59 | 7   | 2.02 | 6.07 | 30  | 2.09 | 6.27 | -1  | 1.84 | 5.52 | 0   | 1.29 | 3.86 | -46 |
| Propargite            | 1.04 | 3.11 | -23 | 0.99 | 2.98 | 2   | 0.97 | 2.90 | 24  | 1.21 | 3.63 | -18 | 1.14 | 3.41 | -15 | 0.92 | 2.75 | -54 |
| Propazine             | 1.28 | 3.85 | -28 | 0.80 | 2.41 | -9  | 1.27 | 3.80 | 11  | 1.26 | 3.77 | -31 | 1.06 | 3.17 | -21 | 1.29 | 3.86 | -55 |
| Propiconazole         | 1.15 | 3.46 | -26 | 1.15 | 3.45 | -12 | 1.26 | 3.79 | 21  | 0.95 | 2.86 | -94 | 1.23 | 3.68 | -16 | 1.12 | 3.35 | -53 |
| Propyzamide           | 0.81 | 2.42 | -20 | 0.92 | 2.76 | 13  | 1.35 | 4.06 | 4   | 0.95 | 2.86 | -29 | 1.14 | 3.41 | -33 | 0.89 | 2.67 | -63 |
| Prosulfocarb          | 0.91 | 2.72 | 161 | 0.79 | 2.37 | 51  | 0.96 | 2.88 | 30  | 0.98 | 2.95 | 71  | 1.01 | 3.03 | 65  | 0.86 | 2.59 | 18  |
| Pyraclostrobin        | 1.16 | 3.47 | -29 | 1.16 | 3.48 | -2  | 1.42 | 4.25 | -87 | 1.00 | 3.01 | -24 | 1.31 | 3.94 | -2  | 1.00 | 3.00 | -49 |
| Pyrazophos            | 0.97 | 2.92 | -15 | 1.08 | 3.23 | -1  | 1.43 | 4.28 | 45  | 0.78 | 2.35 | -4  | 1.28 | 3.83 | 1   | 0.87 | 2.61 | -10 |
| Pyridaben             | 1.06 | 3.19 | -29 | 1.23 | 3.69 | 3   | 2.16 | 6.47 | 34  | 1.68 | 5.04 | -12 | 1.45 | 4.35 | -9  | 1.01 | 3.04 | -55 |
| Pyridafenthion        | 0.90 | 2.69 | -15 | 1.13 | 3.39 | 0   | 1.73 | 5.18 | 28  | 0.86 | 2.58 | 2   | 1.43 | 4.30 | 2   | 0.99 | 2.96 | -42 |
| Pyridate              | 1.00 | 2.99 | -22 | 1.47 | 4.41 | -68 | 1.58 | 4.74 | -27 | 1.34 | 4.03 | -21 | 0.81 | 2.42 | -19 | 1.04 | 3.13 | -58 |
| Rimsulfuron           | 1.40 | 4.21 | -15 | /    | /    | -16 | /    | /    | 15  | 0.93 | 2.78 | -5  | /    | /    | -3  | 0.87 | 2.62 | -47 |
| Saflufenacil          | 0.68 | 2.05 | 10  | 0.98 | 2.94 | -8  | 1.64 | 4.93 | 54  | /    | /    | -19 | 0.89 | 2.67 | 14  | 0.94 | 2.81 | -63 |
| Spinosyn-A            | 0.94 | 2.82 | -20 | 1.12 | 3.36 | -1  | 0.93 | 2.79 | 36  | 0.95 | 2.86 | -18 | 1.36 | 4.08 | -26 | 0.90 | 2.70 | -62 |
| Spirotetramat         | 0.77 | 2.30 | 0   | 1.06 | 3.17 | -5  | 1.34 | 4.03 | 35  | /    | /    | -16 | 1.32 | 3.95 | -1  | 0.71 | 2.12 | -45 |

|              |      |      |     |      |      |     |      |      |     |      |      |     |      |      |     |      |      |     |
|--------------|------|------|-----|------|------|-----|------|------|-----|------|------|-----|------|------|-----|------|------|-----|
| Spiroamine   | 0.91 | 2.72 | -10 | 0.95 | 2.86 | 10  | 1.19 | 3.57 | 35  | 0.70 | 2.09 | -8  | 1.04 | 3.11 | -7  | 0.96 | 2.88 | -48 |
| Sulfotep     | 1.10 | 3.31 | -19 | 1.12 | 3.36 | -7  | 1.44 | 4.32 | 35  | 0.80 | 2.40 | 1   | 1.38 | 4.14 | -14 | 1.05 | 3.14 | -51 |
| Tebufenozide | 1.17 | 3.52 | -13 | 1.03 | 3.09 | 4   | 1.71 | 5.13 | -98 | 1.00 | 3.00 | -11 | 1.19 | 3.58 | -6  | 0.92 | 2.76 | -51 |
| Tebufenpyrad | 1.10 | 3.29 | -23 | 0.91 | 2.73 | -5  | 1.41 | 4.23 | 20  | 0.97 | 2.92 | -16 | 1.02 | 3.05 | -19 | 1.08 | 3.25 | -62 |
| Tepraloxym   | 0.94 | 2.82 | -51 | 1.31 | 3.93 | -11 | 1.89 | 5.67 | 17  | 1.05 | 3.16 | -7  | 1.51 | 4.53 | 4   | 0.92 | 2.77 | -51 |
| Terbufos     | 0.93 | 2.79 | -9  | 0.89 | 2.68 | 22  | 0.96 | 2.88 | 22  | 1.06 | 3.19 | 1   | 0.94 | 2.82 | 7   | 0.75 | 2.26 | -49 |
| Thiobencarb  | 1.03 | 3.09 | -11 | 0.97 | 2.91 | 6   | 1.22 | 3.65 | 6   | 0.92 | 2.76 | 7   | 1.17 | 3.51 | -10 | 1.03 | 3.08 | -57 |
| Tolfenpyrad  | 1.05 | 3.14 | -23 | 0.91 | 2.73 | 6   | 1.61 | 4.83 | 6   | 1.05 | 3.14 | -12 | 1.06 | 3.17 | -6  | 0.96 | 2.89 | -55 |
| Tralkoxym    | 1.11 | 3.34 | -18 | 1.11 | 3.32 | 1   | 1.50 | 4.50 | 1   | /    | /    | -10 | 1.26 | 3.79 | -5  | 1.20 | 3.61 | -56 |
| Triadimefon  | 0.82 | 2.47 | -22 | 0.90 | 2.69 | -7  | 1.14 | 3.41 | -7  | 0.82 | 2.47 | -17 | 1.00 | 3.01 | -31 | 0.98 | 2.93 | -56 |
| Triallate    | 0.69 | 2.07 | -71 | 1.04 | 3.11 | -89 | 1.04 | 3.11 | -39 | 1.78 | 5.34 | -70 | 1.07 | 3.21 | -91 | /    | /    | -96 |
| Tridemorph   | 1.19 | 3.58 | -22 | 1.04 | 3.13 | 2   | 1.28 | 3.85 | 2   | 0.71 | 2.14 | -11 | 0.95 | 2.85 | -7  | 0.92 | 2.76 | -56 |
| Triforine    | 0.86 | 2.57 | -30 | 1.06 | 3.18 | -30 | 1.97 | 5.90 | -30 | 0.88 | 2.65 | -34 | 1.33 | 4.00 | -23 | 2.10 | 6.30 | -68 |
| Zoxamide     | 1.20 | 3.61 | -27 | 1.06 | 3.17 | -8  | 1.16 | 3.48 | -8  | 0.94 | 2.81 | -21 | 1.29 | 3.86 | -9  | 0.92 | 2.77 | -54 |
